1 Mechanisms associated with pyrethroid resistance in  
2 populations of *Aedes aegypti* (Diptera: Culicidae) from the  
3 Caribbean coast of Colombia

4

5 *Kdr* mutations and enzymes associated with pyrethroid  
6 resistance in *Aedes aegypti* in Colombia

7

8 Paula X. Pareja-Loaiza<sup>1\*</sup>, Liliana Santacoloma Varon<sup>2</sup>, Gabriela Rey Vega<sup>2</sup>, Doris Gómez-Camargo<sup>3</sup>,  
9 Ronald Maestre-Serrano<sup>4</sup>, Audrey Lenhart<sup>5</sup>

10

11 <sup>1</sup> Fellow, Convocation C647/2015, National Doctorates/Colciencias, Doctorate in Tropical Medicine  
12 at the State University System of the Caribbean, University of Cartagena, Cartagena de Indias,  
13 Bolívar, Colombia

14 <sup>2</sup> Laboratory of Entomology, Directorate of Public Health Networks, National Institute of Health,  
15 Bogotá, Cundinamarca, Colombia

16 <sup>3</sup> Doctorate in Tropical Medicine at the State University System of the Caribbean, University of  
17 Cartagena, Cartagena de Indias, Bolívar, Colombia

18 <sup>4</sup> Department of Health Sciences, Simón Bolívar University, Barranquilla, Atlántico, Colombia

19 <sup>5</sup> Centers for Disease Control and Prevention, Atlanta, Georgia, USA

20

21 \*Corresponding author

22 E-mail: [paxipa82@gmail.com](mailto:paxipa82@gmail.com) (PXPL)

23

## 24 Abstract

25 *Aedes aegypti* is the main vector of dengue, chikungunya, and Zika viruses, which are of great public  
26 health importance in Colombia. *Aedes* control strategies in Colombia rely heavily on the use of  
27 organophosphate and pyrethroid insecticides, providing constant selection pressure and the  
28 emergence of resistant populations. In recent years, insecticide use has increased due to the  
29 increased incidence of dengue and recent introductions of chikungunya and Zika. In the present  
30 study, pyrethroid resistance was studied across six populations of *A. aegypti* from the Caribbean  
31 coast of Colombia. Susceptibility to  $\lambda$ -cyhalothrin, deltamethrin, and permethrin was assessed, and  
32 resistance intensity was determined. Activity levels of enzymes associated with resistance were  
33 measured, and the frequencies of three *kdr* alleles (V1016I, F1534C, V410L) were calculated. Results  
34 showed variations in pyrethroid susceptibility across *A. aegypti* populations and altered enzyme  
35 activity levels were detected. The *kdr* alleles were detected in all populations, with high variations  
36 in frequencies: V1016I (frequency ranging from 0.15–0.70), F1534C (range 0.94–1.00), and V410L  
37 (range 0.05–0.72). In assays of phenotyped individuals, associations were observed between the  
38 presence of V1016I, F1534C, and V410L alleles and resistance to the evaluated pyrethroids, as well  
39 as between the  $V_{I_{1016I}}/CC_{1534}/V_{L_{410}}$  tri-locus genotype and  $\lambda$ -cyhalothrin and permethrin resistance.  
40 The results of the present study contribute to the knowledge of the mechanisms underlying the  
41 resistance to key pyrethroids used to control *A. aegypti* along the Caribbean coast of Colombia.

42 **Keywords:** *Aedes aegypti*, pyrethroids, *kdr*, insecticide resistance, Colombia

43

## 44 Introduction

45 *Aedes aegypti* (*Stegomyia aegypti*) (Linnaeus, 1762) is the main vector of the dengue (DENV),  
46 chikungunya (CHIKV), and Zika (ZIKV) viruses. The diseases caused by these viruses are of growing  
47 public health importance worldwide owing to increased proliferation of mosquito populations,  
48 increased urbanization, as well as climatic and other environmental conditions suitable for  
49 transmission [1].

50 Globally, the burden of disease caused by dengue is increasing; it is estimated that approximately  
51 390 million dengue infections occur each year, of which 96 million manifest clinically [2]. In 2015,  
52 2.35 million cases of dengue were reported in the Americas, of which >10,200 cases were diagnosed  
53 as severe dengue, causing 1,181 deaths. In Colombia, dengue is considered a public health priority  
54 owing to its endemic transmission as well as the increased occurrence of severe dengue outbreaks,  
55 simultaneous circulation of all four DENV serotypes, and the occurrence of epidemic cycles every  
56 2-3 years. In Colombia, the largest dengue epidemic was recorded in 2010, with >150,000 confirmed  
57 cases and 217 deaths [3]. Moreover, during 2007–2017, 609,228 cases of dengue were reported, of  
58 which 119,888 (19.7%) occurred in the Caribbean Region, specifically in the departments of Atlantic,  
59 Cesar, Córdoba, Sucre, Bolívar, Guajira, Magdalena, and San Andrés y Providencia [4].

60 In addition to the occurrence of dengue, chikungunya and Zika viruses were recently introduced into  
61 Colombia. Regarding the chikungunya virus, the first locally-transmitted cases in Colombia were  
62 recorded in 2014 among the inhabitants of San Joaquin, municipality of Mahates, Department of  
63 Bolivar in the Caribbean region. Until 2017, 488,402 cases of chikungunya had been reported, of  
64 which 118,496 (24.3%) were reported in the departments of the Caribbean region [5]. Regarding  
65 the Zika virus, the first local outbreak of this disease occurred in 2015 in the municipality of Turbaco,

66 Department of Bolivar. Up until 2017, 62,394 cases had been reported nation-wide, of which 6,288  
67 (10.1%) were reported in the departments of the Caribbean Region [6].

68 The transmission of DENV, CHIKV, and ZIKV depends on three components—the host (in this case,  
69 humans), the virus, and the *A. aegypti* vector. Activities related to the prevention and control of  
70 these arboviruses in Colombia have predominantly focused on *A. aegypti* via community-directed  
71 educational campaigns for the elimination of mosquito breeding sites, the application of biological  
72 insecticides to larval habitats (in particular *Bacillus thuringiensis* var. *israelensis*), the use of insect  
73 growth regulators to treat larval habitats, and spraying of pyrethroid and organophosphate  
74 insecticides to control adult mosquitoes [7,8]. Constant selection pressure by pyrethroid and  
75 organophosphate insecticides has resulted in the emergence of resistant *A. aegypti* populations in  
76 multiple areas of Colombia [9-15].

77 Resistance to insecticides in mosquitoes can be caused by the following mechanisms: behavioral  
78 modifications resulting in lessened likelihood of exposure, decreased penetration of the insecticide  
79 across the mosquito cuticle, alterations occurring at the insecticide target site within the mosquito,  
80 and increased detoxification (also referred to as metabolic resistance); the latter two mechanisms  
81 are the most frequently studied [16]. Target site alterations are most commonly caused by *kdr*  
82 mutations on the voltage-dependent sodium channel gene *para*, which is the target site for  
83 pyrethroids and DDT, or by mutations on the *Ace-1* gene (coding for the enzyme  
84 acetylcholinesterase), which is the target site for organophosphate and carbamate insecticides [17].  
85 Metabolic resistance arises due to the increased activity or expression of genes coding for the main  
86 detoxifying enzymes including glutathione S-transferases, mixed-function oxidases, and esterases  
87 [16].

88 In Colombia, the insecticide susceptibility status of *A. aegypti* populations has been monitored for  
89 more than a decade. Since 2004, the National Insecticide Resistance Surveillance Network, headed

90 by Colombia's National Institute of Health, has evaluated approximately 170 populations of *A.*  
91 *aegypti* in 26 of the 32 departments in Colombia. The findings demonstrate variability in  
92 susceptibility to the insecticides temephos,  $\lambda$ -cyhalothrin, deltamethrin, permethrin, cyfluthrin,  
93 etofenprox, malathion, fenitrothion, pirimiphos-methyl, bendiocarb, and propoxur [12-14, 18-29].  
94 Moreover, increased activity levels of insecticide-degrading enzymes, such as nonspecific esterases,  
95 mixed-function oxidases (MFOs), glutathione S-transferases (GSTs), and insensitive  
96 acetylcholinesterase (iAChE), have been observed in resistant populations [9-13, 26]. In addition,  
97 the *kdr* mutations V1016I [13, 30], F1534C [31], and V410L [15] associated with pyrethroid  
98 resistance have recently been detected.

99 Specifically in the Caribbean region, Maestre *et al.* [13] found variations in susceptibility to the  
100 organophosphates temephos, malathion, fenitrothion, and pirimiphos-methyl across *A. aegypti*  
101 populations. In addition, in the majority of the evaluated populations, resistance to the pyrethroids  
102  $\lambda$ -cyhalothrin, deltamethrin, permethrin, and cyfluthrin was observed, with the exception of the  
103 population from Ciénaga (Magdalena), which remained susceptible. This study also reported the  
104 V1016I *kdr* mutation for the first time in Colombia.

105 Atencia *et al.* (2016) [31] found resistance to  $\lambda$ -cyhalothrin in populations of *A. aegypti* from the  
106 department of Sucre (Sincelejo) and reported the F1534C *kdr* mutation for the first time. Granada  
107 *et al.* (2018) [15] detected the V1016I and F1534C mutations in an *A. aegypti* populations from  
108 Riohacha (Guajira), with frequencies of 0.25 for V1016I and 0.71 for F1534C. Moreover, they  
109 reported the V410L mutation for the first time in Colombia, with allelic frequency of 0.30, in the  
110 populations from Riohacha. Notably, the *A. aegypti* mosquitoes in this population were resistant to  
111  $\lambda$ -cyhalothrin.

112

113 The present study builds upon earlier work by further investigating the intensity and spatial extent  
114 of pyrethroid resistance in *A. aegypti* along the Caribbean coast of Colombia and links the frequency  
115 of *kdr* alleles and tri-locus *kdr* haplotypes to insecticide resistant phenotypes. To further understand  
116 the mechanisms of resistance, we also analyzed the activity levels of key detoxification enzyme  
117 groups.

118

## 119 Materials and methods

### 120 *A. aegypti* collections

121 *A. aegypti* were collected in the municipalities of Barranquilla (N 10° 57' 10.622", W 75° 49' 12.024")  
122 and Juan de Acosta (N 10° 49' 44.731", W 75° 2' 9.088") in the department of Atlantico; Cartagena  
123 (N 10° 24' 55.416", W 75° 27' 38.485") in the department of Bolivar; Valledupar (N 9° 56' 55.068",  
124 W 73° 38' 4.164") and Chiriguana (N 9° 21' 41.27", W 73° 35' 58.919") in the department of Cesar;  
125 and Monteria (N 8° 44' 30.866", W 75° 52' 0.433") in the department of Cordoba (Fig 1).

126

127 **Fig 1. Collection sites of *Aedes aegypti* located in the Colombian Caribbean Region** 1. Cesar: a)  
128 Valledupar, b) Chiriguana; 2. Atlantico: a) Barranquilla, b) Juan de Acosta; 3. Bolivar: a) Cartagena;  
129 4) Cordoba: a) Monteria.

130

131 Immature stages were collected from habitats including tanks, pools, plastic/metallic cans, tires,  
132 animal water dishes, and flower vases located around houses. The specimens were reared to adults  
133 and maintained under controlled conditions of temperature (28°C ± 2°C), relative humidity (60% ±

134 10%), and photoperiod (12 h light:12 h dark) in the Public Health Laboratory of the department of  
135 Atlántico.

136 Upon emergence, male mosquitoes were fed with 10% sugar solution, and the females were fed  
137 with mouse (*Mus musculus*) blood every third day to obtain eggs of the F1 generation. Eggs were  
138 stored in an airtight plastic container, until they were hatched to obtain the adult mosquitoes used  
139 in the bioassays.

## 140 Bioassays

141 Insecticide bioassays were performed following the methodologies described by the CDC [32] and  
142 WHO [33]. The pyrethroid insecticides and their concentrations were as follows:  $\lambda$ -cyhalothrin [10  
143  $\mu\text{g}/\text{bottle}$  (CDC) and 0.03% treated papers (WHO)], deltamethrin [10  $\mu\text{g}/\text{bottle}$  (CDC) and 0.03%  
144 treated papers (WHO)], and permethrin [15  $\mu\text{g}/\text{bottle}$  (CDC) and 0.25% treated papers (WHO)]. The  
145 technical grade insecticides (Chem Service<sup>®</sup>) used for the CDC bioassays were provided by the  
146 National Insecticide Resistance Surveillance Network of the Colombian National Institute of Health.  
147 The insecticide-impregnated papers used for the WHO bioassays were provided by Universiti Sains  
148 Malaysia.

149

150 For each population, 20-25 F1 generation, 3- to 5-day-old, unfed female *A. aegypti* were used in  
151 each bioassay replicate; as a control, the susceptible Rockefeller laboratory *A. aegypti* strain was  
152 used. Each bioassay consisted of four replications per insecticide for each population. The diagnostic  
153 time post-exposure was 30 min for the CDC bioassays and 24h for the WHO bioassays. Upon the  
154 completion of the diagnostic time, the living and dead specimens were classified as phenotypically  
155 resistant (R) or susceptible (S), and individually stored in 0.5-mL tubes with a hole in the lid and  
156 desiccated in tightly sealed bags containing silica gel. The bags containing the tubes were stored at  
157  $-80^{\circ}\text{C}$  for the subsequent detection of the V1016I, F1534C, and V410L *kdr* alleles.



158 In populations where resistance was detected via the CDC bioassay, resistance intensity was  
159 determined by conducting additional bioassays employing 2X the original insecticide concentration  
160 [33].

## 161 **Biochemical assays**

162 Biochemical assays were conducted on F1 generation adults. One day post-emergence, 40 unfed  
163 female *A. aegypti* from each population were preserved at  $-80^{\circ}\text{C}$  until processing. Individuals from  
164 the susceptible Rockefeller strain were used as controls. Mosquitoes were homogenized individually  
165 in 30  $\mu\text{l}$  of distilled water for 5-10 seconds with an electric macerator and an additional 270  $\mu\text{l}$  of  
166 distilled water was added for a final volume of 300  $\mu\text{l}$ . Subsequently, each sample were centrifuged  
167 at 12,000 rpm for 60 seconds and aliquoted 10  $\mu\text{l}$  for  $\alpha$ ,  $\beta$ , pNPA-esterases, 15  $\mu\text{l}$  for GST, 20  $\mu\text{l}$  for  
168 MFO and 25  $\mu\text{l}$  for iAChE in triplicate in 96 well microplates. For the tests of mixed-function oxidases  
169 and acetylcholinesterase, the samples were transferred without being centrifuged. Enzyme activity  
170 levels were determined according to the methodology described by Valle *et al.* [34], which  
171 measures the optical densities at predetermined wavelengths to estimate the activity levels of MFO,  
172 iAChE, esterases, and GSTs. Total protein concentration was also determined for each individual to  
173 correct for differences in body sizes [35]. Results were read using an ELISA plate reader (Multiskan™-  
174 Thermo Fisher Scientific®).

## 175 **Detection of *kdr* alleles**

176 Real-time PCR was used to identify the V1016I, F1534C, and V410L *kdr* mutations. To estimate the  
177 allele frequencies in natural populations, 40-50 *A. aegypti* parental (F0) mosquitoes from each  
178 population were analyzed. To estimate associations between genotype and phenotype, all  
179 phenotypically resistant (R) and 30 randomly selected susceptible (S) individuals were analyzed per  
180 insecticide per population.

181 DNA was extracted from individual mosquitoes using the Quanta Biosciences Extracta™ Kit.  
182 Individual mosquitoes were placed in sterile 0.2-mL tubes and 25 µL extraction buffer was added to  
183 each tube, followed by an incubation at 95°C for 30 min in a C1000 Bio-Rad CFX 96 Touch™ Real-  
184 Time System thermocycler. At the end of the incubation, 25 µL of stabilization buffer was added.  
185 DNA was quantified using a NanoDrop™ 2000/2000c spectrophotometer (ThermoFisher Scientific).  
186 PCR reactions were performed in a Bio-Rad C1000 CFX96 Real-Time System thermocycler. Genotype  
187 was determined by analyzing the melting curves of the PCR products. The V1016I mutation was  
188 amplified following the methodology described by Saavedra-Rodríguez *et al.* [36], using a final  
189 reaction volume of 20 µL, containing 6 µL of ddH<sub>2</sub>O, 10 µL of iQ™ SYBR® Green Supermix (Bio-Rad),  
190 1 µL of each of the V1016f, I1016f, and I1016r primers, and 1 µL of DNA template (Table 1). The  
191 cycling conditions were as follows: an initial denaturation at 95°C for 3 min followed by 40 cycles of:  
192 95°C for 10 s, 60°C for 10 s, and 72°C for 30 s; and a final extension at 95°C for 10 s. The melting  
193 curves were determined by a denaturation gradient from 65°C to 95°C with an increase of 0.2°C  
194 every 10 seconds.

195

196 **Table 1. Primer sequences used for detecting *kdr* alleles**

| Mutation | Primer   | Sequence (5'–3')                                             |
|----------|----------|--------------------------------------------------------------|
|          | V1016(f) | 5'-CGGGCAGGGCGGGCGGGGCGGGGCCACAAATTGTTTCCCACCCGCACCGG-3'     |
| V1016I   | I1016(f) | 5'-GCGGGCACAATTGTTTCCCACCCGCACTGA-3'                         |
|          | I1016(r) | 5'-GGATGAACCGAAATTGGACAAAAGC-3'                              |
|          | C1534(f) | 5'-GCGGGCAGGGCGGGCGGGGCGGGGCGGGCCCTACTTTGTGTTCTTCATCATGTG-3' |
| F1534C   | F1534(f) | 5'-GCGGGCTCTACTTTGTGTTCTTCATCATATT-3'                        |
|          | F1534(r) | 5'-TCTGCTCGTTGAAGTTGTCGAT-3'                                 |
|          | V410(f)  | 5'-GCGGGCAGGGCGGGGCGGGGCGGGGCCATCTTCTGGGTTCTACCGTG-3'        |
| V410L    | L410(f)  | 5'-GCGGGCATCTTCTGGGTTCTACCGTTCTACCATT-3'                     |
|          | L410(r)  | 5'-TTCTTCTCGGGCGGCTCTT-3'                                    |

197

198 The F1534C mutation was detected following the methodology described by Yanola *et al.* [37], using  
199 a final reaction volume of 20  $\mu\text{L}$  comprised of 7.15  $\mu\text{L}$  of ddH<sub>2</sub>O, 9  $\mu\text{L}$  of iQ™ SYBR® Green Supermix  
200 (Bio-Rad), 0.6  $\mu\text{L}$  of each of the F1534f and C1534r primers, 0.65  $\mu\text{L}$  of the C1534f primers, and 2  $\mu\text{L}$   
201 of DNA template (Table 1). The cycling conditions were as follows: an initial denaturation at 95°C  
202 for 3 min followed by 37 cycles of: 95°C for 10 s, 57°C for 30 s, and 72°C for 30 s; and a final extension  
203 at 95°C for 10 s. The melting curves were determined by a denaturation gradient from 65°C to 95°C  
204 with an increase of 0.5°C every 5 s.

205 The V410L mutation was detected following the methodology described by Haddi *et al.* [38], using  
206 a final reaction volume of 21  $\mu\text{L}$  comprised of 9.6  $\mu\text{L}$  of ddH<sub>2</sub>O, 10  $\mu\text{L}$  of iQ™ SYBR® Green Supermix  
207 (Bio-Rad), 0.1  $\mu\text{L}$  of each of the L410f and V410f primers, 0.2  $\mu\text{L}$  of the L410r primer, and 1.0  $\mu\text{L}$  of  
208 DNA template (Table 1). The cycling conditions were as follows: an initial denaturation at 95°C for 3  
209 min followed by 39 cycles of: 95°C for 10 s, 60°C for 10 s, and 72°C for 30 s; and a final extension at  
210 95°C for 10 s. The melting curves were determined by a denaturation gradient from 65°C to 95°C  
211 with an increase of 0.2°C every 10 s.

212 Each mosquito was analyzed in duplicate. For all assays for each mutation, three positive controls  
213 were included: a wild-type homozygote, a homozygote mutant, and a heterozygote. All assays also  
214 included a negative control consisting of master mix without DNA template.

215

## 216 Data analysis

### 217 Bioassays

218 Mortality was scored at the diagnostic time per insecticide per population. Populations were  
219 categorized according to the WHO criteria [33], whereby 98%–100% mortality indicates  
220 susceptibility, 90%–97% suggests resistance is developing and <90% mortality indicates resistance.

## 221 **Biochemical assays**

222 Absorbance values were entered into Excel databases to calculate the average and standard  
223 deviation for each mosquito. To express the absorbance values in terms of enzymatic activity, data  
224 regarding the homogenate volume of each mosquito, total protein content for each mosquito, and  
225 units of activity for each enzyme group were calculated according to the protocol described by Valle  
226 *et al.* [34]. The cutoff value for the susceptible Rockefeller strain was determined based on the 99<sup>th</sup>  
227 percentile of absorbance, and the percentage of individuals from the field strains with activity levels  
228 that exceeded this cutoff value were classified according to the criteria proposed by Montella *et al.*  
229 [39]: <15% unaltered, 15%–50% altered, and >50% highly altered.

230 After determining the activity levels for each enzyme group, an analysis of variance was performed,  
231 followed by Tukey's multiple comparison test, with the significance level set at  $p \leq 0.05$ , to identify  
232 populations with any statistically significant differences as compared to the Rockefeller reference  
233 strain.

## 234 **Allelic and genotypic frequencies of the V1016I, F1534C, and V410L mutations**

235 Results were obtained using Bio-Rad's Precision Melt Analysis Software™ and were interpreted as  
236 follows. For the V1016I mutation, a melting peak at 77°C corresponded to a mutant homozygote  
237 (I/I), a peak at 82°C corresponded to a wild-type homozygote (V/V), and peaks at both 77°C and 82°C  
238 corresponded to a heterozygote (V/I). For the F1534C mutation, a peak at 82°C corresponded to a  
239 mutant homozygote (C/C), a peak at 78°C corresponded to a wild-type homozygote (F/F), and peaks  
240 at both 78°C and 82°C corresponded to a heterozygote (F/C). For the V410L mutation, a peak at 80°C  
241 corresponded to a mutant homozygote (L/L), a peak at 83°C corresponded to a wild-type  
242 homozygote (V/V), and peaks at both 80°C and 83°C corresponded to a heterozygote (V/L).

243 From the parental mosquitoes (F0), the population-level allele frequencies for I1016, C1534, and  
244 L410 were calculated using Eq (1) as follows

245

$$246 \quad \frac{n \text{ heterozygotes} + 2 (n \text{ homozygotes})}{2 (\text{total } n \text{ mosquitoes analyzed})} \quad (1)$$

247

248 The genotypic frequencies for  $V_{1016}/V_{1016}$ ,  $F_{1534}/F_{1534}$ ,  $V_{410}/V_{410}$ ,  $I_{1016}/I_{1016}$ ,  $C_{1534}/C_{1534}$ ,  $L_{410}/L_{410}$ ,  
249  $V_{1016}/I_{1016}$ ,  $F_{1534}/C_{1534}$ ,  $V_{410}/L_{410}$  were calculated using Eq (2)

250

$$251 \quad \frac{n \text{ mosquitoes with the genotype to be calculated}}{\text{total } n \text{ mosquitoes analyzed}} \quad (2)$$

252

253 The Hardy–Weinberg principle was tested, as shown in Eq (3)

254

$$255 \quad p^2 + 2pq + q^2 = 1 \quad (3)$$

256

257 where p is the number of wild-type homozygotes, pq is the frequency of heterozygotes, and q is the  
258 frequency of mutant homozygotes.

259 Expected wild-type  $V_{1016}/V_{1016}$ ,  $F_{1534}/F_{1534}$ ,  $V_{410}/V_{410}$  homozygotes =  $p^2$  (n)

260 Expected  $V_{1016}/I_{1016}$ ,  $F_{1534}/C_{1534}$ ,  $V_{410}/L_{410}$  heterozygotes =  $2pq$  (n)

261 Expected mutant  $I_{1016}/I_{1016}$ ,  $C_{1534}/C_{1534}$ ,  $L_{410}/L_{410}$  homozygotes =  $q^2$  (n)

262 The Chi square test was used to determine whether the populations were in Hardy–Weinberg  
263 equilibrium, as shown in Eq (4):

$$264 \quad \chi^2_{\text{calc}} = \sum \frac{(f_o - f_e)^2}{f_e} \quad (4)$$

265  $f_o$ : Frequency observed value

266  $f_e$ : Frequency expected value

267 If the calculated value of  $\chi^2$  was < tabulated  $\chi^2$  (1 gl) = 3.84 and  $P < 0.05$ , the  $H_0$  that the study  
268 population was in Hardy–Weinberg equilibrium was accepted; otherwise, if the calculated  $\chi^2$  was  $\geq$   
269 tabulated  $\chi^2$ , the  $H_a$  that the study population was not in Hardy–Weinberg equilibrium was accepted.

270 In addition, the coefficient of endogamy was calculated using Eq (5) as follows:

271

$$272 \quad F_{IS} = 1 - \left( \frac{H_{obs}}{H_{exp}} \right) \quad (5)$$

273

274 where,  $H_{obs}$  is the number of observed heterozygotes and  $H_{exp}$  is the number of expected  
275 heterozygotes; if  $F_{IS}$  was significantly higher than 0, an excess of homozygotes was considered, and  
276 if  $F_{IS}$  was significantly less than 0, an excess of heterozygotes was considered in the population, with  
277 a significance of  $P < 0.05$ . In addition, the frequencies of tri-locus genotypes were determined in the  
278 study populations.

### 279 Association of *kdr* mutations with pyrethroid resistance

280 The association between resistant and susceptible phenotypes and their *kdr* genotypes was tested  
281 using contingency tables, and the relationship between phenotype and tri-locus genotype was  
282 tested using the statistical software programs OpenEpi version 3.0  
283 (<https://www.openepi.com/TwoByTwo/TwoByTwo.htm>) and GraphPad Prism version 8.1.

284

## 285 Results

### 286 Bioassays

287 A total of 1732 adult female *A. aegypti* were tested in WHO bioassays for susceptibility to  $\lambda$ -  
288 cyhalothrin (n=564), deltamethrin (n=586), and permethrin (n=582). Resistance to  $\lambda$ -cyhalothrin and  
289 permethrin was detected in all six evaluated populations. Resistance was most frequent in Monteria  
290 with 43.3% mortality to  $\lambda$ -cyhalothrin and 24.0% mortality to permethrin. Cartagena was the least  
291 resistant, with mortalities of 86.4% to  $\lambda$ -cyhalothrin and 77.6% to permethrin. Susceptibility to  
292 deltamethrin was observed in the populations from Juan de Acosta (98% mortality) and Barranquilla

293 (100% mortality), and possible development of resistance was detected in Valledupar (96.8%  
294 mortality) and Monteria (93.2% mortality). The populations from Cartagena (87.9% mortality) and  
295 Chiriguana (86.0% mortality) were found to be resistant to deltamethrin (Fig 2).

296

297 **Fig 2. Mortality of the six populations of *A. aegypti* evaluated against diagnostic doses of**  
298 **pyrethroid insecticides following WHO bioassay methodology.**

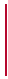



300 Additionally, a total of 1822 adult female *A. aegypti* were tested in CDC bioassays for susceptibility  
 301 to  $\lambda$ -cyhalothrin (n=606), deltamethrin (n=608), and permethrin (n=608). Resistance to  $\lambda$ -cyhalothrin  
 302 was detected in the populations from Barranquilla (79.6% mortality), Chiriguana (83.5% mortality),  
 303 Juan de Acosta (71.6% mortality), and Monteria (35% mortality), whereas the populations from  
 304 Cartagena (98.0% mortality) and Valledupar (100% mortality) were susceptible (Fig 3a).  
 305 Susceptibility to deltamethrin was observed in all populations, with mortalities of 100% (Fig 3b).  
 306 Resistance to permethrin was detected in the populations from Juan de Acosta (80.0% mortality),  
 307 Monteria (69.0% mortality), and Barranquilla (64% mortality), and susceptibility was observed in the  
 308 populations from Cartagena, Chiriguana and Valledupar, with mortalities of 100% (Fig 3c). (Fig. 3).  
 309 In populations where resistance intensity was assessed, 100% mortality at the diagnostic time was  
 310 observed after exposure to twice the concentration (2X) of the recommended diagnostic dose for  
 311  $\lambda$ -cyhalothrin (20  $\mu$ g/bottle) and permethrin (30  $\mu$ g/bottle) (Table 2).

312

313 **Fig 3. Mortality of the six populations of *A. aegypti* evaluated against diagnostic doses of**  
 314 **pyrethroid insecticides following CDC bioassay methodology.** a)  $\lambda$ -cyhalothrin (10 $\mu$ g/bottle), b)  
 315 Deltamethrin (10 $\mu$ g/bottle, c) Permethrin (15 $\mu$ g/bottle).

316

317 **Table 2. Mortality of *A. aegypti* exposed to 1X and 2X the diagnostic doses of  $\lambda$ -cyhalothrin and**  
 318 **permethrin.**

| Insecticide                                                                                     | Populations       | 1 $\times$ DD     |               | 2 $\times$ DD     |               |
|-------------------------------------------------------------------------------------------------|-------------------|-------------------|---------------|-------------------|---------------|
|                                                                                                 |                   | 10 $\mu$ g/bottle |               | 20 $\mu$ g/bottle |               |
|                                                                                                 |                   | n <sup>a</sup>    | Mortality (%) | n                 | Mortality (%) |
| $\lambda$ -cyhalothrin<br>(DD <sup>b</sup> : 10<br>$\mu$ g/bottle, DT <sup>c</sup> : 30<br>min) | Barranquilla      | 103               | 76.61         | 100               | 100           |
|                                                                                                 | Chiriguana        | 103               | 83.49         | 100               | 100           |
|                                                                                                 | Juan de<br>Acosta | 102               | 71.56         | 100               | 100           |
|                                                                                                 | Monteria          | 100               | 35.0          | 100               | 100           |

| Insecticide                               | Populations    | 15 µg/bottle |               | 30 µg/bottle |               |
|-------------------------------------------|----------------|--------------|---------------|--------------|---------------|
|                                           |                | N            | Mortality (%) | n            | Mortality (%) |
| Permethrin (DD: 15 µg/bottle, DT: 30 min) | Barranquilla   | 100          | 64.0          | 100          | 100           |
|                                           | Juan de Acosta | 100          | 80.0          | 100          | 100           |
|                                           | Monteria       | 100          | 69.0          | 100          | 100           |
|                                           |                |              |               |              |               |

319 a Total number of females evaluated, b Diagnostic dose, c Diagnostic time.

## 320 Biochemical assays

321 Based on the classification criteria of Montella *et al.* [39],  $\alpha$ -esterase enzyme levels were highly  
 322 altered in the population from Monteria, where 79% of individuals exceeded the 99<sup>th</sup> percentile of  
 323 the Rockefeller reference population (Fig.4A). Similarly,  $\beta$ -esterase activity levels were highly altered  
 324 in the population of Monteria (97%) and were also altered in the populations from Juan de Acosta  
 325 (45%), Barranquilla (31%), , Valledupar (27%) and Cartagena (12%) (Fig.4B), and pNPA-esterase  
 326 activity levels were altered in the population from Juan de Acosta (14%) (Fig 4C). Highly altered MFO  
 327 activity levels were detected in the populations from Juan de Acosta (92%), Monteria (97%), and  
 328 Valledupar (88%) (Fig 4D). Altered GST activity levels were detected in the populations from  
 329 Barranquilla (17%), Cartagena (24%), Juan de Acosta (44%), Monteria (34%) and Chiriguana (4%)  
 330 (Fig. 4E). AChE activity remained unaltered in all populations evaluated (Fig. 4F). Overall, significant  
 331 differences were observed between the mean activity levels of most enzyme groups between the  
 332 field populations and the Rockefeller reference strain ( $p < 0.05$ ) (Fig 4).

333

334 **Fig 4. Box plots of enzymatic activity levels.** *Aedes aegypti* populations with elevated enzymatic  
 335 activity compared to the Rockefeller strain are marked with (\*). (A).  $\alpha$ -esterases, (B).  $\beta$ -esterases,  
 336 (C). pNPA- esterases, (D). mixed-function oxidases (MFO), (E). glutathione-S-transferases (GSTs), and  
 337 (F). insensitive acetylcholinesterase (iAChE). ROCK: Rockefeller; BARQ: Barranquilla-, CART:  
 338 Cartagena; CHIR: Chiriguana; JDEA: Juan de Acosta; MONT: Monteria and VDPR: Valledupar.

### 339 *kdr* allele frequencies

340 All three *kdr* mutations were detected in all the populations evaluated. Regarding the V1016I  
341 mutation, all three genotypes (VV<sub>1016</sub>, VI<sub>1016</sub>, and II<sub>1016</sub>) were detected in each field population. The  
342 mutant allele I1016 was the most prevalent in the population from Monteria, with a frequency of  
343 0.70, and the least prevalent in the populations from Barranquilla and Valledupar, with a frequency  
344 of 0.15 in both. Regarding the F1534C mutation, all three genotypes (FF<sub>1534</sub>, FC<sub>1534</sub>, and CC<sub>1534</sub>) were  
345 detected in the populations from Barranquilla and Juan de Acosta, whereas only FC<sub>1534</sub> and CC<sub>1534</sub>  
346 were detected in Cartagena, Chiriguana, and Valledupar, with CC<sub>1534</sub> predominating in all  
347 populations. It is noteworthy that the CC<sub>1534</sub> genotype was fixed in the population from Monteria  
348 with a frequency of 1.0 (Table 3). In addition, the frequency of the C1534 mutant allele in the  
349 populations from Cartagena, Valledupar, and Chiriguana ranged between 0.94 and 0.97, but was  
350 0.76 in the populations from Barranquilla and Juan de Acosta. Regarding the V410L mutation, all  
351 three genotypes (VV<sub>410</sub>, VL<sub>410</sub>, and LL<sub>410</sub>) were detected in each field population. The highest  
352 frequency of the L410 allele was detected in Montería with a frequency of 0.72, whereas the lowest  
353 was detected in Valledupar with a frequency of 0.05. For the other populations, the frequencies of  
354 the L410 allele ranged between 0.12 and 0.32 (Table 3).

355 **Table 3. Genotype and allele frequencies of the V1016I, F1534C, and V410L *kdr* mutations in F0**

356 **A. aegypti females.**

| Population     | n <sup>a</sup> | Genotype frequency |      |      | Allele frequency |      | Hardy–Weinberg |         | F <sub>IS</sub> |      |
|----------------|----------------|--------------------|------|------|------------------|------|----------------|---------|-----------------|------|
|                |                | V1016I             |      |      | V1016I           |      | χ <sup>2</sup> | p value |                 |      |
|                |                | VV                 | VI   | II   | V                | I    |                |         |                 |      |
| Barranquilla   | 49             | 0.71               | 0.27 | 0.02 | 0.85             | 0.15 | 0.02           | 0.87    | -0.02           |      |
| Cartagena      | 46             | 0.74               | 0.20 | 0.07 | 0.84             | 0.16 | 3.68           | 0.06    | 0.28            |      |
| Chiriguaná     | 47             | 0.57               | 0.34 | 0.09 | 0.74             | 0.26 | 0.51           | 0.47    | 0.10            |      |
| Juan de Acosta | 48             | 0.75               | 0.23 | 0.04 | 0.86             | 0.16 | 0.88           | 0.34    | 0.15            |      |
| Montería       | 43             | 0.09               | 0.42 | 0.49 | 0.30             | 0.70 | 0.00           | 0.95    | 0.00            |      |
| Valledupar     | 48             | 0.73               | 0.25 | 0.02 | 0.85             | 0.15 | 0.00           | 0.98    | -0.00           |      |
|                |                | F1534C             |      |      | F1534C           |      | χ <sup>2</sup> | p value | F <sub>IS</sub> |      |
|                |                | N                  | FF   | FC   | CC               | F    |                |         |                 | C    |
|                |                | Barranquilla       | 49   | 0.10 | 0.29             | 0.61 |                |         |                 | 0.24 |
| Cartagena      | 46             | 0.00               | 0.07 | 0.93 | 0.03             | 0.97 | 0.05           | 0.82    | -0.03           |      |
| Chiriguaná     | 47             | 0.00               | 0.11 | 0.89 | 0.05             | 0.95 | 0.15           | 0.70    | -0.05           |      |
| Juan de Acosta | 48             | 0.04               | 0.44 | 0.54 | 0.26             | 0.76 | 0.80           | 0.37    | -0.10           |      |
| Montería       | 43             | 0.00               | 0.00 | 1.00 | 0.00             | 1.00 | -              | -       | -               |      |
| Valledupar     | 48             | 0.00               | 0.13 | 0.87 | 0.06             | 0.94 | 0.21           | 0.64    | -0.07           |      |
|                |                | V410L              |      |      | V410L            |      | χ <sup>2</sup> | p value | F <sub>IS</sub> |      |
|                |                | N                  | VV   | VL   | LL               | V    |                |         |                 | L    |
|                |                | Barranquilla       | 49   | 0.02 | 0.20             | 0.78 |                |         |                 | 0.88 |
| Cartagena      | 46             | 0.07               | 0.37 | 0.57 | 0.75             | 0.25 | 0.00           | 0.92    | 0.01            |      |
| Chiriguaná     | 47             | 0.09               | 0.47 | 0.45 | 0.68             | 0.32 | 0.28           | 0.59    | -0.07           |      |
| Juan de Acosta | 48             | 0.02               | 0.27 | 0.71 | 0.84             | 0.16 | 0.03           | 0.85    | -0.02           |      |
| Montería       | 43             | 0.51               | 0.42 | 0.07 | 0.28             | 0.72 | 0.07           | 0.79    | -0.04           |      |
| Valledupar     | 48             | 0.04               | 0.02 | 0.94 | 0.95             | 0.05 | 29.88          | 0.00    | 0.79            |      |

357 a Number of mosquitoes evaluated

358 VV<sub>1016</sub>/FF<sub>1534</sub>/VV<sub>410</sub>: wild-type homozygotes

359 VI<sub>1016</sub>/FC<sub>1534</sub>/VL<sub>410</sub>: heterozygotes

360 II<sub>1016</sub>/CC<sub>1534</sub>/LL<sub>410</sub> mutant homozygotes

361 Hardy–Weinberg equilibrium  $\chi^2$  ( $p < 0.05$ ).

362 F<sub>IS</sub> inbreeding coefficient

363

364 For loci 1016 and 1534, all genotypes were found to be in Hardy–Weinberg equilibrium. In the case  
365 of locus 410, the genotypes of most populations, except Valledupar, were in Hardy–Weinberg  
366 equilibrium ( $p < 0.05$ ). When determining the inbreeding coefficients ( $F_{IS}$ ) for I1016, values  $< 0$  were  
367 obtained for the populations from Barranquilla and Valledupar due to an excess of heterozygotes,  
368 in contrast to the populations from Cartagena, Chiriguana, Juan de Acosta, and Monteria, where  
369 values  $> 0$  were recorded due to a deficiency of heterozygotes. For C1534, a generalized excess of  
370 heterozygotes was observed, with the exception of Barranquilla, where a deficiency of  
371 heterozygotes was observed. Similarly, for L410, the populations from Barranquilla, Cartagena, and  
372 Valledupar showed a deficiency of heterozygotes, in contrast to Chiriguana, Juan de Acosta, and  
373 Monteria, where an excess of heterozygotes was detected (Table 3).

374 Of the 27 combinations of tri-locus genotypes, 13 combinations were detected in 281 mosquitoes  
375 collected from the six evaluated populations. The triple homozygous wild-type genotype ( $VV_{1016}$ ,  
376  $FF_{1534}$ , and  $VV_{410}$ ) was detected only in the populations from Barranquilla and Juan de Acosta, with  
377 frequencies of 0.08 and 0.04, respectively, whereas the triple homozygous mutant genotype ( $II_{1016}$ ,  
378  $CC_{1534}$ , and  $LL_{410}$ ) was present in all populations except Valledupar, with frequencies between 0.02  
379 (Barranquilla) and 0.49 (Monteria). Similarly, the triple heterozygous genotype ( $VI_{1016}$ ,  $FC_{1534}$ , and  
380  $VL_{410}$ ) was present only in Chiriguana and Juan de Acosta at low frequencies (0.02 and 0.06,  
381 respectively). The homozygous wild-type genotype for loci 1016 and 410 and homozygous resistant  
382 for locus 1534 ( $VV_{1016}/CC_{1534}/VV_{410}$ ) was most frequent in Barranquilla, Cartagena, Chiriguana, and  
383 Valledupar, with frequencies of 0.37, 0.54, 0.43, and 0.58, respectively; the exceptions were Juan  
384 de Acosta, where the most frequent genotype was homozygous wild-type for loci 1016 and 410 and  
385 heterozygous for locus 1534 ( $VV_{1016}/FC_{1534}/VV_{410}$ ) with a frequency of 0.33, and Monteria, where the  
386 most frequent genotype was the triple homozygous mutant ( $II_{1016}/CC_{1534}/LL_{410}$ ), with a frequency of  
387 0.49 (Fig 5).

388

389 **Fig 5. Frequencies of the 13 tri-locus genotypes present in F0 *A. aegypti* females.** The order of the  
390 genotypes is 1016/1534/410. Mutant alleles: 1016 = I, 1534 = C, and 410 = L. The triple-mutant  
391 homozygous genotype is shown at the top and the triple-wild-type homozygous genotype at the  
392 bottom of each chart.

393

### 394 Association of *kdr* alleles with phenotypic resistance to pyrethroids

395 Based on the results obtained with the mosquitoes exposed to insecticides in the WHO bioassays, a  
396 significant association ( $p < 0.05$ ) was identified between the *kdr* alleles 1016I, 1534C, and 410L and  
397 resistance to  $\lambda$ -cyhalothrin in the populations from Juan de Acosta, Montería, and Valledupar.  
398 Similarly, an association was observed between the 1534C allele and resistance to deltamethrin in  
399 the populations of Chiriguana, Monteria, and Valledupar and between the 1016I and 410L alleles  
400 and resistance to deltamethrin in the population of Montería. A significant association ( $p < 0.05$ )  
401 was also detected between the 1016I, 1534C, and 410L alleles and resistance to permethrin in the  
402 populations from Chiriguana, Monteria, and Valledupar; between the 1534C allele and resistance to  
403 permethrin in Barranquilla, Cartagena, and Juan de Acosta; and between the 410L allele and  
404 permethrin resistance in Juan de Acosta (Tables 4–6).

405 Less association was detected between *kdr* alleles and the observed phenotype in the CDC  
406 bioassays. A significant association ( $p < 0.05$ ) between the 1534C allele and resistance to  $\lambda$ -  
407 cyhalothrin was detected in the population from Barranquilla and between the 1016I and 410L  
408 alleles and resistance to permethrin in the population from Montería. Despite the resistance to  
409 pyrethroids detected with the CDC bioassays in the populations from Chiriguana and Juan de Acosta,

410 no significant associations were detected between *kdr* alleles and resistant phenotypes in these  
411 populations (Tables 7-8).

412 **Table 4. Association between 1016I, 1534C, and 410L alleles and resistance to  $\lambda$ -cyhalothrin in**  
 413 **adult *A. aegypti* in WHO bioassays.**

|                | <i>kdr</i><br>mutation | Genotype | n <sup>a</sup> | $\lambda$ -cyhalothrin |                | OR <sup>d</sup> (95%CI) <sup>e</sup> | <i>p</i> value <sup>f</sup> |
|----------------|------------------------|----------|----------------|------------------------|----------------|--------------------------------------|-----------------------------|
|                |                        |          |                | Phenotype              |                |                                      |                             |
|                |                        |          |                | R <sup>b</sup>         | S <sup>c</sup> |                                      |                             |
| Barranquilla   | V1016I                 | II       | 0              | 0                      | 0              | 0.80 (0.23-2.83)                     | 0.740                       |
|                |                        | VI       | 15             | 4                      | 11             |                                      |                             |
|                |                        | VV       | 28             | 9                      | 19             |                                      |                             |
|                | F1534C                 | CC       | 22             | 6                      | 16             | 0.63 (0.23-1.70)                     | 0.361                       |
|                |                        | FC       | 18             | 5                      | 13             |                                      |                             |
|                |                        | FF       | 3              | 2                      | 1              |                                      |                             |
|                | V410L                  | LL       | 0              | 0                      | 0              | 0.74 (0.18-2.99)                     | 0.670                       |
|                |                        | VL       | 12             | 3                      | 9              |                                      |                             |
|                |                        | VV       | 31             | 10                     | 21             |                                      |                             |
| Cartagena      | V1016I                 | II       | 2              | 1                      | 1              | 1.26 (0.34-4.59)                     | 0.726                       |
|                |                        | VI       | 9              | 2                      | 7              |                                      |                             |
|                |                        | VV       | 30             | 8                      | 22             |                                      |                             |
|                | F1534C                 | CC       | 30             | 10                     | 20             | 2.5 (0.512-12.2)                     | 0.245                       |
|                |                        | FC       | 8              | 0                      | 8              |                                      |                             |
|                |                        | FF       | 3              | 1                      | 2              |                                      |                             |
|                | V410L                  | LL       | 2              | 1                      | 1              | 1.44 (0.39-5.38)                     | 0.582                       |
|                |                        | VL       | 8              | 2                      | 6              |                                      |                             |
|                |                        | VV       | 31             | 8                      | 33             |                                      |                             |
| Chiriguana     | V1016I                 | II       | 12             | 6                      | 6              | 0.50 (0.23-1.06)                     | 0.069                       |
|                |                        | VI       | 22             | 13                     | 9              |                                      |                             |
|                |                        | VV       | 28             | 21                     | 7              |                                      |                             |
|                | F1534C                 | CC       | 53             | 37                     | 16             | 4.05 (0.96-17.09)                    | 0.042                       |
|                |                        | FC       | 9              | 3                      | 6              |                                      |                             |
|                |                        | FF       | 0              | 0                      | 0              |                                      |                             |
|                | V410L                  | LL       | 9              | 6                      | 3              | 0.97 (0.44-2.15)                     | 0.948                       |
|                |                        | VL       | 21             | 13                     | 8              |                                      |                             |
|                |                        | VV       | 32             | 21                     | 11             |                                      |                             |
| Juan de Acosta | V1016I                 | II       | 3              | 3                      | 0              | 3.02 (1.28-7.11)                     | *0.009                      |
|                |                        | VI       | 26             | 15                     | 11             |                                      |                             |
|                |                        | VV       | 27             | 8                      | 19             |                                      |                             |
|                | F1534C                 | CC       | 35             | 22                     | 13             | 5.14 (1.61-16.40)                    | *0.003                      |
|                |                        | FC       | 20             | 4                      | 16             |                                      |                             |
|                |                        | FF       | 1              | 0                      | 1              |                                      |                             |
|                |                        | LL       | 4              | 3                      | 1              |                                      |                             |



|                   |               |           |           |    |    |                  |                     |        |
|-------------------|---------------|-----------|-----------|----|----|------------------|---------------------|--------|
| <b>Monteria</b>   | <b>V410L</b>  | <b>VL</b> | 23        | 14 | 9  | 2.78 (1.19-6.58) | *0.017              |        |
|                   |               | <b>VV</b> | 29        | 9  | 20 |                  |                     |        |
|                   | <b>V1016I</b> |           | <b>II</b> | 16 | 12 | 4                | 4.85 (2.31-10.18)   | *0.000 |
|                   |               |           | <b>VI</b> | 37 | 33 | 4                |                     |        |
|                   |               |           | <b>VV</b> | 29 | 7  | 22               |                     |        |
|                   |               |           | <b>CC</b> | 63 | 47 | 16               |                     |        |
|                   | <b>F1534C</b> |           | <b>FC</b> | 15 | 4  | 11               | 6.46 (2.38-17.51)   | *0.000 |
|                   |               |           | <b>FF</b> | 4  | 1  | 3                |                     |        |
|                   |               |           | <b>LL</b> | 11 | 11 | 0                |                     |        |
|                   | <b>V410L</b>  |           | <b>VL</b> | 36 | 28 | 8                | 6.02 (2.60-13.91)   | *0.000 |
|                   |               |           | <b>VV</b> | 35 | 13 | 22               |                     |        |
|                   |               |           | <b>II</b> | 1  | 1  | 0                |                     |        |
| <b>Valledupar</b> | <b>V1016I</b> |           | <b>VI</b> | 5  | 4  | 1                | 13.62 (1.56-118.80) | *0.003 |
|                   |               |           | <b>VV</b> | 40 | 11 | 29               |                     |        |
|                   |               |           | <b>CC</b> | 12 | 11 | 1                |                     |        |
|                   | <b>F1534C</b> |           | <b>FC</b> | 23 | 5  | 18               | 10.8 (3.61-32.28)   | *0.000 |
|                   |               |           | <b>FF</b> | 11 | 0  | 11               |                     |        |
|                   |               |           | <b>LL</b> | 1  | 1  | 0                |                     |        |
|                   | <b>V410L</b>  |           | <b>VL</b> | 5  | 4  | 1                | 13.62 (1.56-118.8)  | *0.003 |
|                   |               |           | <b>VV</b> | 40 | 11 | 29               |                     |        |
|                   |               | <b>II</b> | 1         | 1  | 0  |                  |                     |        |

414

415 <sup>a</sup>Sample size, <sup>b</sup>Resistant mosquitoes, <sup>c</sup>Susceptible mosquitoes, <sup>d</sup>Odds ratio for the association  
 416 between the mutant alleles 1016I, 1534C, and 410L and resistance to  $\lambda$ -cyhalothrin, <sup>e</sup>Lower and  
 417 upper limits of the confidence interval for the OR, <sup>f</sup>Significant difference ( $p < 0.05$ )

418 **Table 5. Association between 1016I, 1534C, and 410L alleles and resistance to deltamethrin in**  
 419 **adult *A. aegypti* in WHO bioassays.**

|                | <i>kdr</i><br>mutation | Genotype | Deltamethrin   |                |                | OR <sup>d</sup> (95%CI) <sup>e</sup> | <i>p</i> value <sup>f</sup> |
|----------------|------------------------|----------|----------------|----------------|----------------|--------------------------------------|-----------------------------|
|                |                        |          | n <sup>a</sup> | Phenotype      |                |                                      |                             |
|                |                        |          |                | R <sup>b</sup> | S <sup>c</sup> |                                      |                             |
| Cartagena      | V1016I                 | II       | 1              | 0              | 1              | 0.52 (0.13-2.01)                     | 0.337                       |
|                |                        | VI       | 15             | 3              | 12             |                                      |                             |
|                |                        | VV       | 25             | 8              | 17             |                                      |                             |
|                | F1534C                 | CC       | 22             | 4              | 18             | 0.58 (0.20-1.66)                     | 0.312                       |
|                |                        | FC       | 15             | 6              | 9              |                                      |                             |
|                |                        | FF       | 4              | 1              | 3              |                                      |                             |
|                | V410L                  | LL       | 1              | 0              | 1              | 0.52 (0.13-2.01)                     | 0.337                       |
|                |                        | VL       | 15             | 3              | 12             |                                      |                             |
|                |                        | VV       | 25             | 8              | 17             |                                      |                             |
| Chiriguana     | V1016I                 | II       | 0              | 0              | 0              | 3.14 (0.74-13.26)                    | 0.105                       |
|                |                        | VI       | 9              | 4              | 5              |                                      |                             |
|                |                        | VV       | 30             | 5              | 25             |                                      |                             |
|                | F1534C                 | CC       | 11             | 6              | 5              | 5.71 (1.50-21.81)                    | *0.006                      |
|                |                        | FC       | 21             | 3              | 18             |                                      |                             |
|                |                        | FF       | 7              | 0              | 7              |                                      |                             |
|                | V410L                  | LL       | 0              | 0              | 0              | 3.8 (0.70-20.77)                     | 0.103                       |
|                |                        | VL       | 6              | 3              | 3              |                                      |                             |
|                |                        | VV       | 33             | 6              | 27             |                                      |                             |
| Juan de Acosta | V1016I                 | II       | 0              | 1              | 0              | 9 (0.90-93.17)                       | 0.031                       |
|                |                        | VI       | 16             | 1              | 15             |                                      |                             |
|                |                        | VV       | 15             | 0              | 15             |                                      |                             |
|                | F1534C                 | CC       | 20             | 2              | 18             | 0.0                                  | 0.253                       |
|                |                        | FC       | 9              | 0              | 9              |                                      |                             |
|                |                        | FF       | 3              | 0              | 3              |                                      |                             |
|                | V410L                  | LL       | 1              | 1              | 0              | 3.29 (0.42-25.50)                    | 0.233                       |
|                |                        | VL       | 14             | 0              | 14             |                                      |                             |
|                |                        | VV       | 17             | 1              | 16             |                                      |                             |
| Montería       | V1016I                 | II       | 5              | 4              | 1              | 6.57 (2.08-20.71)                    | *0.000                      |
|                |                        | VI       | 16             | 4              | 12             |                                      |                             |
|                |                        | VV       | 18             | 1              | 17             |                                      |                             |
|                | F1534C                 | CC       | 29             | 9              | 20             | 0.0                                  | *0.039                      |
|                |                        | FC       | 8              | 0              | 8              |                                      |                             |
|                |                        | FF       | 2              | 0              | 2              |                                      |                             |
|                |                        | LL       | 5              | 4              | 1              |                                      |                             |

|                   |               |           |    |   |    |                  |        |
|-------------------|---------------|-----------|----|---|----|------------------|--------|
|                   | <b>V410L</b>  | <b>VL</b> | 18 | 4 | 14 | 5.5 (1.77-17.11) | *0.001 |
|                   |               | <b>VV</b> | 16 | 1 | 15 |                  |        |
| <b>Valledupar</b> |               | <b>II</b> | 0  | 0 | 0  |                  |        |
|                   | <b>V1016I</b> | <b>VI</b> | 3  | 0 | 3  | 0.0              | 0.517  |
|                   |               | <b>VV</b> | 31 | 4 | 27 |                  |        |
|                   |               | <b>CC</b> | 5  | 3 | 2  |                  |        |
|                   | <b>F1534C</b> | <b>FC</b> | 16 | 0 | 16 | 6 (1.11-32.45)   | *0.022 |
|                   |               | <b>FF</b> | 13 | 1 | 12 |                  |        |
|                   |               | <b>LL</b> | 0  | 0 | 0  |                  |        |
|                   | <b>V410L</b>  | <b>VL</b> | 3  | 0 | 3  | 0.0              | 0.517  |
|                   |               | <b>VV</b> | 31 | 4 | 27 |                  |        |

420

421 <sup>a</sup>Sample size, <sup>b</sup>Resistant mosquitoes, <sup>c</sup>Susceptible mosquitoes, <sup>d</sup>Odds ratio for the association  
 422 between the mutant alleles 1016I, 1534C, and 410L and resistance to deltamethrin, <sup>e</sup>Lower and  
 423 upper limits of the confidence interval for the OR, <sup>f</sup>Significant difference ( $p < 0.05$ )

424 **Table 6. Association between 1016I, 1534C, and 410L alleles and resistance to permethrin in**  
 425 **adult *A. aegypti* in WHO bioassays.**

|                | <i>kdr</i><br>mutation | Genotype | n <sup>a</sup> | Permethrin     |                | OR <sup>d</sup> (95%CI) <sup>e</sup> | <i>p</i> value <sup>f</sup> |  |
|----------------|------------------------|----------|----------------|----------------|----------------|--------------------------------------|-----------------------------|--|
|                |                        |          |                | Phenotype      |                |                                      |                             |  |
|                |                        |          |                | R <sup>b</sup> | S <sup>c</sup> |                                      |                             |  |
| Barranquilla   | V1016I                 | II       | 3              | 3              | 0              | 1.78 (0.66-4.78)                     | 0.249                       |  |
|                |                        | VI       | 18             | 11             | 7              |                                      |                             |  |
|                |                        | VV       | 30             | 17             | 13             |                                      |                             |  |
|                | F1534C                 | CC       | 35             | 22             | 13             | 3.01 (1.28-7.09)                     | *0.009                      |  |
|                |                        | FC       | 20             | 8              | 12             |                                      |                             |  |
|                |                        | FF       | 6              | 1              | 5              |                                      |                             |  |
|                | V410L                  | LL       | 1              | 1              | 0              | 2.21 (0.82-5.93)                     | 0.110                       |  |
|                |                        | VL       | 19             | 12             | 7              |                                      |                             |  |
|                |                        | VV       | 41             | 18             | 23             |                                      |                             |  |
| Cartagena      | V1016I                 | II       | 2              | 1              | 1              | 0.57 (0.62-3.98)                     | 0.337                       |  |
|                |                        | VI       | 19             | 10             | 9              |                                      |                             |  |
|                |                        | VV       | 32             | 12             | 20             |                                      |                             |  |
|                | F1534C                 | CC       | 32             | 17             | 15             | 3.09 (1.12-8.53)                     | *0.025                      |  |
|                |                        | FC       | 17             | 6              | 11             |                                      |                             |  |
|                |                        | FF       | 4              | 0              | 4              |                                      |                             |  |
|                | V410L                  | LL       | 2              | 1              | 1              | 1.4 (0.55-3.59)                      | 0.482                       |  |
|                |                        | VL       | 18             | 9              | 9              |                                      |                             |  |
|                |                        | VV       | 33             | 13             | 20             |                                      |                             |  |
| Chiriguana     | V1016I                 | II       | 3              | 3              | 0              | 13.92 (3.13-61.84)                   | *0.000                      |  |
|                |                        | VI       | 20             | 18             | 2              |                                      |                             |  |
|                |                        | VV       | 44             | 16             | 28             |                                      |                             |  |
|                | F1534C                 | CC       | 21             | 18             | 3              | 5.01 (2.40-10.50)                    | *0.000                      |  |
|                |                        | FC       | 33             | 18             | 15             |                                      |                             |  |
|                |                        | FF       | 13             | 1              | 12             |                                      |                             |  |
|                | V410L                  | LL       | 4              | 4              | 0              | 28.32 (3.70-216.80)                  | *0.000                      |  |
|                |                        | VL       | 17             | 16             | 1              |                                      |                             |  |
|                |                        | VV       | 46             | 17             | 29             |                                      |                             |  |
| Juan de Acosta | V1016I                 | II       | 13             | 8              | 5              | 1.58 (0.78-3.20)                     | 0.201                       |  |
|                |                        | VI       | 26             | 17             | 9              |                                      |                             |  |
|                |                        | VV       | 30             | 14             | 16             |                                      |                             |  |
|                | F1534C                 | CC       | 48             | 32             | 16             | 3.38 (1.27-8.93)                     | *0.010                      |  |
|                |                        | FC       | 20             | 7              | 13             |                                      |                             |  |
|                |                        | FF       | 1              | 0              | 1              |                                      |                             |  |
|                |                        |          | LL             | 7              | 6              | 1                                    |                             |  |

|            | <i>kdr</i> mutation | Genotype | Phenotype      |                |    | OR <sup>d</sup> (95%CI) <sup>e</sup> | <i>p</i> value <sup>f</sup> |
|------------|---------------------|----------|----------------|----------------|----|--------------------------------------|-----------------------------|
|            |                     |          | R <sup>b</sup> | S <sup>c</sup> |    |                                      |                             |
| Monteria   | V410L               | VL       | 30             | 19             | 11 | 2.38 (1.11-5.12)                     | *0.023                      |
|            |                     | VV       | 32             | 14             | 18 |                                      |                             |
|            | V1016I              | II       | 23             | 20             | 3  | 2.99 (1.40-6.35)                     | *0.003                      |
|            |                     | VI       | 29             | 24             | 5  |                                      |                             |
|            |                     | VV       | 40             | 24             | 16 |                                      |                             |
|            | F1534C              | CC       | 70             | 64             | 6  | 33 (10.51-103.60)                    | *0.000                      |
|            |                     | FC       | 16             | 4              | 12 |                                      |                             |
|            |                     | FF       | 6              | 0              | 6  |                                      |                             |
|            | V410L               | LL       | 21             | 20             | 1  | 5.69 (2.27-14.28)                    | *0.000                      |
| VL         |                     | 25       | 21             | 4              |    |                                      |                             |
| VV         |                     | 46       | 27             | 19             |    |                                      |                             |
| Valledupar | V1016I              | II       | 3              | 3              | 0  | 10.45 (2.93-37.29)                   | *0.000                      |
|            |                     | VI       | 19             | 16             | 3  |                                      |                             |
|            |                     | VV       | 39             | 12             | 27 |                                      |                             |
|            | F1534C              | CC       | 24             | 22             | 2  | 11.78 (4.85-28.60)                   | *0.000                      |
|            |                     | FC       | 25             | 9              | 16 |                                      |                             |
|            |                     | FF       | 12             | 0              | 12 |                                      |                             |
|            | V410L               | LL       | 3              | 3              | 0  | 10.45 (2.93-37.29)                   | *0.000                      |
|            |                     | VL       | 19             | 16             | 3  |                                      |                             |
|            |                     | VV       | 39             | 12             | 27 |                                      |                             |

426

427 <sup>a</sup>Sample size, <sup>b</sup>Resistant mosquitoes, <sup>c</sup>Susceptible mosquitoes, <sup>d</sup>Odds ratio for the association  
 428 between the mutant alleles 1016I, 1534C, and 410L and resistance to permethrin, <sup>e</sup>Lower and upper  
 429 limits of the confidence interval for the OR, <sup>f</sup>Significant difference (*p* < 0.05)

430

431 **Table 7. Association between 1016I, 1534C, and 410L alleles and resistance to λ-cyhalothrin in**  
 432 **adult *A. aegypti* in CDC bioassays.**

|              | <i>kdr</i> mutation | Genotype | λ-cyhalothrin  |                |                | OR <sup>d</sup> (95%CI) <sup>e</sup> | <i>p</i> value <sup>f</sup> |
|--------------|---------------------|----------|----------------|----------------|----------------|--------------------------------------|-----------------------------|
|              |                     |          | n <sup>a</sup> | Phenotype      |                |                                      |                             |
|              |                     |          |                | R <sup>b</sup> | S <sup>c</sup> |                                      |                             |
| Barranquilla | V1016I              | II       | 0              | 0              | 0              | 2.06 (0.70-0.18)                     | 0.182                       |
|              |                     | VI       | 16             | 9              | 7              |                                      |                             |
|              |                     | VV       | 35             | 12             | 23             |                                      |                             |
|              | F1534C              | CC       | 27             | 16             | 11             | 4.28 (1.47-12.51)                    | *0.005                      |
|              |                     | FC       | 21             | 5              | 16             |                                      |                             |
|              |                     | FF       | 3              | 0              | 3              |                                      |                             |

|                |        |    |    |    |                  |                   |       |
|----------------|--------|----|----|----|------------------|-------------------|-------|
|                |        | LL | 0  | 0  | 0                |                   |       |
|                | V410L  | VL | 16 | 9  | 7                | 2.06 (0.70-6.07)  | 0.182 |
|                |        | VV | 35 | 12 | 23               |                   |       |
| Quiriguana     | V1016I | II | 6  | 3  | 3                |                   |       |
|                |        | VI | 22 | 7  | 15               | 1.15 (0.48-2.75)  | 0.753 |
|                |        | VV | 19 | 7  | 12               |                   |       |
|                | F1534C | CC | 43 | 16 | 27               |                   |       |
|                |        | FC | 4  | 1  | 3                | 1.73 (0.17-17.38) | 0.634 |
|                |        | FF | 0  | 0  | 0                |                   |       |
| V410L          | LL     | 6  | 3  | 3  |                  |                   |       |
|                | VL     | 24 | 9  | 15 | 1.47 (0.62-3.46) | 0.382             |       |
|                | VV     | 17 | 5  | 12 |                  |                   |       |
| Juan de Acosta | V1016I | II | 4  | 3  | 1                |                   |       |
|                |        | VI | 21 | 11 | 10               | 1.94 (0.82-4.58)  | 0.126 |
|                |        | VV | 31 | 12 | 19               |                   |       |
|                | F1534C | CC | 29 | 14 | 15               |                   |       |
|                |        | FC | 23 | 10 | 13               | 1.07 (0.47-2.46)  | 0.867 |
|                |        | FF | 4  | 2  | 2                |                   |       |
| V410L          | LL     | 4  | 2  | 2  |                  |                   |       |
|                | VL     | 24 | 12 | 12 | 1.22 (0.54-2.78) | 0.631             |       |
|                | VV     | 28 | 12 | 16 |                  |                   |       |
| Monteria       | V1016I | II | 14 | 10 | 4                |                   |       |
|                |        | VI | 51 | 35 | 16               | 1.41 (0.77-2.57)  | 0.269 |
|                |        | VV | 35 | 20 | 15               |                   |       |
|                | F1534C | CC | 98 | 63 | 35               |                   |       |
|                |        | FC | 1  | 1  | 0                | 0.30 (0.01-6.12)  | 0.409 |
|                |        | FF | 1  | 1  | 0                |                   |       |
| V410L          | LL     | 15 | 10 | 5  |                  |                   |       |
|                | VL     | 50 | 34 | 16 | 1.20 (0.66-2.18) | 0.545             |       |
|                | VV     | 35 | 21 | 14 |                  |                   |       |

433

434 <sup>a</sup>Sample size, <sup>b</sup>Resistant mosquitoes, <sup>c</sup>Susceptible mosquitoes, <sup>d</sup>Odds ratio for the association  
 435 between the mutant alleles 1016I, 1534C, and 410L and resistance to  $\lambda$ -cyhalothrin, <sup>e</sup>Lower and  
 436 upper limits of the confidence interval for the OR, <sup>f</sup>Significant difference ( $p < 0.05$ )

437 **Table 8. Association between 1016I, 1534C, and 410L alleles and resistance to permethrin in**  
 438 **adult *A. aegypti* in CDC bioassays.**

Permethrin

|                | <i>kdr</i> mutation | Genotype | n <sup>a</sup> | Phenotype      |                | OR <sup>d</sup> (95%CI) <sup>e</sup> | p value <sup>f</sup> |
|----------------|---------------------|----------|----------------|----------------|----------------|--------------------------------------|----------------------|
|                |                     |          |                | R <sup>b</sup> | S <sup>c</sup> |                                      |                      |
| Barranquilla   | V1016I              | II       | 4              | 3              | 1              | 1.67 (0.84-3.29)                     | 0.139                |
|                |                     | VI       | 36             | 14             | 22             |                                      |                      |
|                |                     | VV       | 60             | 29             | 41             |                                      |                      |
|                | F1534C              | CC       | 54             | 21             | 33             | 1.05 (0.55-2.01)                     | 0.865                |
|                |                     | FC       | 35             | 10             | 25             |                                      |                      |
|                |                     | FF       | 11             | 5              | 6              |                                      |                      |
|                | V410L               | LL       | 3              | 2              | 1              | 1.70 (0.83-3.45)                     | 0.141                |
|                |                     | VL       | 33             | 14             | 19             |                                      |                      |
|                |                     | VV       | 64             | 20             | 44             |                                      |                      |
| Juan de Acosta | V1016I              | II       | 2              | 1              | 1              | 1.25 (0.50-3.12)                     | 0.637                |
|                |                     | VI       | 21             | 9              | 12             |                                      |                      |
|                |                     | VV       | 27             | 10             | 17             |                                      |                      |
|                | F1534C              | CC       | 24             | 9              | 15             | 0.69 (0.29-1.67)                     | 0.413                |
|                |                     | FC       | 24             | 9              | 15             |                                      |                      |
|                |                     | FF       | 2              | 2              | 0              |                                      |                      |
|                | V410L               | LL       | 2              | 1              | 1              | 1.25 (0.50-3.12)                     | 0.637                |
|                |                     | VL       | 21             | 9              | 12             |                                      |                      |
|                |                     | VV       | 27             | 10             | 17             |                                      |                      |
| Monteria       | V1016I              | II       | 11             | 7              | 4              | 2.08 (1.01-4.30)                     | *0.045               |
|                |                     | VI       | 36             | 21             | 15             |                                      |                      |
|                |                     | VV       | 14             | 3              | 11             |                                      |                      |
|                | F1534C              | CC       | 61             | 31             | 30             | 1.03 (0.02-52.91)                    | 0.987                |
|                |                     | FC       | 0              | 0              | 0              |                                      |                      |
|                |                     | FF       | 0              | 0              | 0              |                                      |                      |
|                | V410L               | LL       | 11             | 7              | 4              | 2.08 (1.01-4.30)                     | *0.045               |
|                |                     | VL       | 36             | 21             | 15             |                                      |                      |
|                |                     | VV       | 14             | 3              | 11             |                                      |                      |

439

440 <sup>a</sup>Sample size, <sup>b</sup>Resistant mosquitoes, <sup>c</sup>Susceptible mosquitoes, <sup>d</sup>Odds ratio for the association

441 between the mutant alleles 1016I, 1534C, and 410L and resistance to  $\lambda$ -cyhalothrin, <sup>e</sup>Lower and

442 upper limits of the confidence interval for the OR, <sup>f</sup>Significant difference (p < 0.05)

443

444

## 445 Comparisons of tri-locus genotypes with resistance to pyrethroids

446 Of the 27 possible combinations of genotypes, 20 combinations of tri-locus genotypes were  
 447 detected in the 918 mosquitoes phenotyped in WHO bioassays. The most common haplotypes were  
 448  $VV_{1016}/CC_{1534}/VV_{410}$  (n=233 mosquitoes, 25.4%),  $VV_{1016}/FC_{1534}/VV_{410}$  (n=198, 21.6%), and  
 449  $VI_{1016}/CC_{1534}/VL_{410}$  (n=187, 20.4%). Wild-type double homozygotes at loci 1016 and 410 in the  
 450 presence of CC1534/FC1534 were significantly more likely to be phenotypically susceptible to  
 451 deltamethrin ( $p < 0.05$ ). Heterozygotes at both loci 1016 and 410 in the presence of CC1534 were  
 452 significantly more likely to be resistant to  $\lambda$ -cyhalothrin and permethrin ( $p < 0.05$ ) and susceptible  
 453 to deltamethrin ( $p < 0.05$ ) (Table 9).

454

455 **Table 9. Tri-locus genotypes of phenotyped adult *A. aegypti* from the six study populations after**  
 456 **WHO bioassay.**

| Insecticide           | Phenotype      | n <sup>c</sup> | tri-locus genotype |          |          |          |          |          |          |          |          |          |          |          |          |          |          |          |          |          |          |          |          |          |          |
|-----------------------|----------------|----------------|--------------------|----------|----------|----------|----------|----------|----------|----------|----------|----------|----------|----------|----------|----------|----------|----------|----------|----------|----------|----------|----------|----------|----------|
|                       |                |                | II/CC/LL           | II/FC/LL | VI/CC/LL | II/CC/VL | VI/FC/LL | VV/CC/LL | II/FC/VL | VI/CC/VL | II/CC/VV | VI/CC/VV | VV/CC/VL | II/FC/VV | VI/FC/VL | VV/FF/LL | VI/FF/VL | VV/FC/VL | II/FF/VV | VI/FC/VV | VV/CC/VV | VV/FF/VL | VI/FF/VV | VV/FC/VV | VV/FF/VV |
| $\lambda$ cyhalothrin | R <sup>a</sup> | 158            | 22                 | 0        | 0        | 1        | 0        | 0        | 0        | 56       | 0        | 7        | 0        | 0        | 7        | 0        | 0        | 0        | 0        | 47       | 0        | 1        | 14       | 3        |          |
|                       | S <sup>b</sup> | 172            | 4                  | 0        | 0        | 5        | 1        | 0        | 0        | 18       | 2        | 6        | 0        | 0        | 18       | 0        | 0        | 0        | 0        | 47       | 0        | 0        | 53       | 18       |          |
| Deltamethrin          | R              | 35             | 5                  | 0        | 0        | 0        | 0        | 0        | 0        | 8        | 0        | 1        | 0        | 0        | 2        | 0        | 0        | 0        | 0        | 1        | 10       | 0        | 0        | 6        | 2        |
|                       | S              | 150            | 2                  | 0        | 0        | 0        | 0        | 0        | 0        | 30       | 0        | 0        | 0        | 0        | 14       | 0        | 0        | 1        | 0        | 3        | 31       | 1        | 0        | 42       | 26       |
| Permethrin            | R              | 229            | 33                 | 0        | 1        | 4        | 1        | 0        | 0        | 66       | 0        | 8        | 3        | 0        | 19       | 0        | 0        | 1        | 0        | 2        | 60       | 0        | 0        | 29       | 2        |
|                       | S              | 174            | 2                  | 0        | 1        | 3        | 0        | 0        | 1        | 9        | 0        | 2        | 0        | 1        | 21       | 0        | 1        | 0        | 1        | 2        | 38       | 0        | 0        | 54       | 38       |
| Total                 |                | 918            | 68                 | 0        | 2        | 13       | 2        | 0        | 1        | 187      | 2        | 24       | 3        | 1        | 81       | 0        | 1        | 2        | 1        | 8        | 233      | 1        | 1        | 198      | 89       |

457

458 <sup>a</sup>Resistant (living), <sup>b</sup>Susceptible (dead), <sup>c</sup>Total number of mosquitoes. The order of the genotypes is  
 459 shown for loci 1016/1534/410. Resistant allele at locus 1016 = I, 1534 = C, 410 = L, triple-resistant



460 genotype II/CC/LL, triple-susceptible genotype VV/FF/VV. Significant differences between resistant  
461 and susceptible are shown in bold ( $p < 0.05$ ).

462

463 From the CDC bioassays, 15 combinations of tri-locus genotypes were observed in 465 mosquitoes  
464 assayed with  $\lambda$ -cyhalothrin and permethrin in Barranquilla, Juan de Acosta, and Monteria. Similar to  
465 the WHO bioassays, the most common haplotypes were VI<sub>1016</sub>/CC<sub>1534</sub>/VL<sub>410</sub> (n=161, 34.6%) and  
466 VV<sub>1016</sub>/CC<sub>1534</sub>/VV<sub>410</sub> (n=117, 25.2%). Wild-type double homozygotes at loci 1016 and 410 in the  
467 presence of CC1534/FC1534 were significantly more likely to be phenotypically susceptible to  $\lambda$ -  
468 cyhalothrin and permethrin ( $p < 0.05$ ) (Table 10).

469

470 **Table 10. Tri-locus genotypes of phenotyped adult *A. aegypti* after CDC bioassay.**

| Insecticide           | Phenotype      | n <sup>c</sup> | tri-locus genotype |          |          |          |          |          |          |          |          |          |          |          |          |          |          |          |          |          |          |          |          |          |          |
|-----------------------|----------------|----------------|--------------------|----------|----------|----------|----------|----------|----------|----------|----------|----------|----------|----------|----------|----------|----------|----------|----------|----------|----------|----------|----------|----------|----------|
|                       |                |                | II/CC/LL           | II/FC/LL | VI/CC/LL | II/CC/VL | VI/FC/LL | VV/CC/LL | II/FC/VL | VI/CC/VL | II/CC/VV | VI/CC/VV | VV/CC/VL | II/FC/VV | VI/FC/VL | VV/FF/LL | VI/FF/VL | VV/FC/VL | II/FF/VV | VI/FC/VV | VV/CC/VV | VV/FF/VL | VI/FF/VV | VV/FC/VV | VV/FF/VV |
| $\lambda$ cyhalothrin | R <sup>a</sup> | 129            | 14                 | 0        | 1        | 2        | 0        | 0        | 0        | 52       | 0        | 2        | 3        | 0        | 5        | 0        | 1        | 1        | 0        | 1        | 35       | 0        | 0        | 10       | 2        |
|                       | S <sup>b</sup> | 125            | 7                  | 0        | 1        | 1        | 0        | 2        | 0        | 41       | 0        | 1        | 1        | 0        | 5        | 0        | 0        | 2        | 0        | 0        | 33       | 0        | 0        | 25       | 6        |
| Permethrin            | R              | 87             | 10                 | 0        | 0        | 1        | 0        | 0        | 0        | 34       | 0        | 1        | 0        | 0        | 9        | 0        | 0        | 0        | 0        | 0        | 15       | 0        | 0        | 10       | 7        |
|                       | S              | 124            | 6                  | 0        | 0        | 0        | 0        | 0        | 0        | 34       | 0        | 3        | 1        | 0        | 9        | 0        | 0        | 1        | 0        | 3        | 34       | 1        | 0        | 27       | 5        |
| Total                 |                | 465            | 37                 | 0        | 2        | 4        | 0        | 2        | 0        | 161      | 0        | 7        | 5        | 0        | 28       | 0        | 1        | 4        | 0        | 4        | 117      | 1        | 0        | 72       | 20       |

471 <sup>a</sup>Resistant (alive), <sup>b</sup>Susceptible (dead), <sup>c</sup>Total number of mosquitoes. The order of the genotypes is  
472 shown for loci 1016/1534/410. Resistant allele at locus 1016 = I, 1534 = C, 410 = L, triple-resistant  
473 genotype II/CC/LL, triple-susceptible genotype VV/FF/VV.

474

## 475 Discussion

476 In Colombia, the use of pyrethroids for the control of *A. aegypti* is a fairly recent phenomenon.  
477 Among the pyrethroids,  $\lambda$ -cyhalothrin and deltamethrin have most commonly been used to control  
478 *A. aegypti* in Colombia. However, resistance to  $\lambda$ -cyhalothrin has been more commonly reported  
479 than resistance to deltamethrin in Colombia, as demonstrated by results from previous studies [7,  
480 9, 10, 11, 13, 18] as well as those obtained in the present study. In the findings presented here, we  
481 detected resistance to permethrin and  $\lambda$ -cyhalothrin in all populations and varying degrees of  
482 susceptibility to deltamethrin. This heterogeneity of resistance patterns within the pyrethroid class  
483 suggests that diverse mechanisms are contributing to these phenotypes.  
484 Resistance to DDT is widespread in Colombia owing to the application of this organochlorine  
485 compound for more than five decades in the country [23]. DDT and pyrethroids share the mode of  
486 action consisting of delayed sodium channel closure and membrane repolarization [45]. The  
487 modification of this target site due to the presence of *kdr* mutations on the *para* gene can lead to  
488 cross-resistance to both DDT and pyrethroids. As such, the high prevalence of *kdr* alleles detected  
489 in our study may also be linked to previous selection pressures caused by DDT.  
490 When our findings are compared with previous studies of insecticide resistance in *A. aegypti* in  
491 Colombia, our results are consistent with the findings of Maestre *et al.* [13] that reported resistance  
492 to  $\lambda$ -cyhalothrin in Barranquilla and Montería. However, those authors reported  $\lambda$ -cyhalothrin  
493 resistance and moderate resistance in Valledupar and Cartagena, respectively, whereas we detected  
494 resistance using the WHO bioassay but susceptibility using the CDC bioassay in both populations.  
495 Our results showing permethrin resistance were consistent with those reported by Maestre *et al.*  
496 [13] for Barranquilla and Montería; however, for Cartagena and Valledupar, Maestre *et al.* [13]  
497 reported susceptibility, whereas we observed resistance using the WHO bioassay but susceptibility  
498 using the CDC bioassay. For deltamethrin, Maestre *et al.* [13] reported resistance in Barranquilla;

499 however, we found susceptibility using both bioassay methodologies. In Montería and Valledupar,  
500 Maestre *et al.* reported deltamethrin resistance in both populations, whereas we found  
501 susceptibility using the CDC bioassay and indications that resistance was developing using the WHO  
502 bioassay. In Cartagena, Maestre *et al.* [13] reported moderate deltamethrin resistance, whereas we  
503 observed resistance using the WHO bioassay and susceptibility using the CDC bioassay.

504 In Colombia, most previous insecticide susceptibility studies conducted on adult *A. aegypti*  
505 mosquitoes have used the CDC bioassay methodology, with the WHO bioassay methodology  
506 employed to a lesser degree. Typically, using both techniques, resistance to DDT has been observed  
507 in all *A. aegypti* populations evaluated in the country, together with variable susceptibility to  
508 pyrethroids and susceptibility to organophosphates in most populations [7].

509 In the present study, some discrepancies were observed between the results obtained with the  
510 WHO and CDC bioassay methodologies, indicating that the two techniques may not always provide  
511 consistent results. In studies by Aizoun *et al.* [42] and Fonseca *et al.* [23]., WHO and CDC bioassays  
512 were compared to determine the susceptibility of *Anopheles gambiae* to deltamethrin and  
513 *Anopheles nuñeztovari* to fenitrothion. Both studies reported susceptibility when using the WHO  
514 bioassay and resistance when using the CDC bioassay. The authors observed that the exposure time  
515 of the mosquitoes to the insecticide (diagnostic time) was considerably shorter in the case of the  
516 CDC bioassay, which could have led to an overestimation of resistance; although in fact the opposite  
517 was observed in our study. Despite the shorter exposure time in the CDC bioassay, populations that  
518 were classified as resistant in the WHO bioassay were classified as susceptible in the CDC bioassay.

519 This could potentially be explained due to the mechanisms underlying the resistance; for example,  
520 resistance that is primarily caused by *kdr* would likely result in populations that are not quickly  
521 knocked down and thus scored as 'resistant' at 30 minutes. However, if the main mechanisms of  
522 resistance are metabolic, mosquitoes may initially be knocked down but could recover over time as

523 their detoxification enzymes metabolize the insecticide. Indeed, our biochemical assay data suggest  
524 that elevated enzymatic activity is present in the populations that were studied.

525

526 Most previous studies regarding enzymatic activity have been conducted on *A. aegypti* populations  
527 from other regions of Colombia where alterations were detected, mainly in MFOs and nonspecific  
528 esterases, in populations from Antioquia, Chocó, Putumayo, Cauca, Valle del Cauca, Nariño, Huila,  
529 Santander, Meta, and Casanare [9-12]. The one previous study conducted in the Caribbean region  
530 of Colombia reported altered  $\alpha$ -esterases and MFOs in *A. aegypti* from Valledupar, MFOs in  
531 Ciénaga, and GSTs in Sincelejo. In Cartagena, Monteria, Barranquilla, San Juan, Puerto Colombia,  
532 and Soledad, no alterations in enzyme activity were detected [13]. Our results are consistent with  
533 the finding of highly altered MFOs in Valledupar, and we also detected altered  $\beta$ -esterases in that  
534 same population. We also detected highly altered  $\alpha$ -esterases,  $\beta$ -esterases, MFOs and GSTs in  
535 Monteria; altered  $\beta$ -esterases and GSTs in Barranquilla; and altered GSTs in Cartagena. Additionally,  
536 in the present study we detected altered pNPA-esterases in the population of Juan de Acosta.

537 Regarding esterases, studies to date have reported the overexpression of  $\beta$ -esterases in populations  
538 resistant to organophosphates and pyrethroids [9-11]. Altered levels of  $\alpha$ -esterase activity were  
539 detected previously in Valledupar in the study conducted by Maestre *et al.* [13]. In other countries,  
540 altered  $\alpha$ -esterases,  $\beta$ -esterases, and MFOs have been reported in *A. aegypti* populations resistant  
541 to organophosphates, carbamates, and pyrethroids [39, 48-54].

542 There are no studies in Colombia incriminating insensitive acetylcholinesterase as a mechanism  
543 associated with resistance to organophosphates and carbamates in *A. aegypti*. A study by Grisales  
544 *et al.* [27] reported resistance to temephos in the population of *A. aegypti* from Cucuta (RR: 15X)  
545 without evidence of insensitive acetylcholinesterase, although they did detect esterase and oxidase-  
546 based mechanisms.

547 *Kdr* mutations are important mechanisms involved in DDT and pyrethroid resistance. In Colombia,  
548 the first *kdr* mutation reported in populations of *A. aegypti* was V1016I, which was identified in  
549 populations from Puerto Colombia, Soledad, Barranquilla, Valledupar, San Juan, Sincelejo,  
550 Montería, Cienaga and Cartagena, which are all located in the Caribbean region. In that initial report,  
551 the V1016I mutation showed frequencies ranging between 0.07 and 0.35; the lowest frequency was  
552 found in the Cienaga population and the highest was found in Soledad, Montería, and Barranquilla,  
553 with frequencies of 0.35, 0.33, and 0.32, respectively [13]. The highest frequency of 1016I that we  
554 detected in the present study was in Montería, with a frequency of 0.70, showing a large increase  
555 in the frequency in this population from what was originally reported by Maestre *et al.* [13]. In  
556 addition, an increase in the frequency of 1016I from 0.09 to 0.16 was detected in Cartagena and a  
557 reduced frequency was detected in Barranquilla and Valledupar, from 0.32 and 0.27, respectively,  
558 to 0.15 in both populations. V1016I had also previously been reported in Quindío at low levels of  
559 frequency (0.02–0.05) [29].

560 The F1534C mutation was first detected in Colombia in the department of Sincelejo (Sucre), in the  
561 Caribbean region [31]. It had also previously been reported in *A. aegypti* populations from Puerto  
562 Colombia, Soledad, Barranquilla, Valledupar, San Juan, Sincelejo, Montería, Cienaga and Cartagena  
563 with frequencies ranging between 0.74 and 0.88. When compared with the results reported  
564 previously, we observed increased frequencies of 1534C, having risen in Barranquilla from 0.74 to  
565 0.76, in Cartagena from 0.86 to 0.97, in Montería from 0.88 to 1.00, and in Valledupar from 0.82 to  
566 0.94. These increases are likely attributable to the constant pressure exerted by pyrethroid  
567 insecticides, which were heavily applied during the period between the two studies for the control  
568 of dengue, chikungunya, and Zika. Although there are no previous studies reporting this mutation  
569 in Juan de Acosta and Chiriguana, these populations also showed high frequencies (0.76 and 0.95,  
570 respectively). Moreover, high frequencies of 1534C have been reported in other areas of Colombia,

571 including Villavicencio, Riohacha, and Bello, with frequencies of 0.63, 0.71, and 0.56, respectively  
572 [15]. In these latter three populations, the V410L mutation was also identified in Colombia for the  
573 first time, with frequencies of 0.46, 0.30, and 0.06, respectively. It is noteworthy that in that study,  
574 *A. aegypti* from Bello were susceptible to  $\lambda$ -cyhalothrin, whereas those from Riohacha and  
575 Villavicencio were resistant. In these latter two populations, the researchers detected a positive  
576 association between V410L and V1016I and resistance to  $\lambda$ -cyhalothrin. In the present study, the  
577 V410L mutation was detected for the first time in the study populations, with frequencies ranging  
578 between 0.05 in Valledupar and 0.72 in Montería. The frequencies of the V1016I mutation were  
579 very similar to those of the V410L mutation in all the evaluated populations; this result is consistent  
580 with the findings reported by Granada *et al.* [15] for *A. aegypti* in Bello, Villavicencio, and Riohacha.  
581 Haddi *et al.* [38] reported the presence of the V410L mutation in resistant *A. aegypti* in Brazil and  
582 observed that this mutation, either alone or in combination with the F1534C mutation, was strongly  
583 associated with increased the resistance to type I and II pyrethroids. This is consistent with the  
584 results of the present study, where the 1534C and 410L alleles were associated with resistance to  
585 permethrin in the population of Juan de Acosta. The 1016I, 1534C, and 410L alleles were all  
586 associated with resistance to permethrin in the Chiriguana, Montería, and Valledupar populations  
587 based on phenotyping by the WHO bioassay. In addition, F1534C was associated with resistance to  
588 deltamethrin in Chiriguana, Valledupar, and Montería; V1016I and V410L were also associated with  
589 deltamethrin resistance in the case of the latter population. Similarly, an association was found  
590 between all three mutations and resistance to  $\lambda$ -cyhalothrin in Valledupar, Montería, and Juan de  
591 Acosta. This last result is consistent with the results of the study by Maestre *et al.* [55] which  
592 detected a significant positive correlation between the frequency of the 1016I allele and resistance  
593 to permethrin,  $\lambda$ -cyhalothrin, and cyfluthrin. However, no significant correlation was observed in  
594 that same study between 1534C and resistance to any pyrethroids [55].

595 Recent studies conducted in Mexico proposed three sequential models to explain the evolution of  
596 the V1016I, F1534C, and V410L mutations. The first model suggests that F1534C appeared first,  
597 providing low resistance levels, followed by the appearance of V1016I, which provided higher levels  
598 of resistance. The second model challenges the first model and proposes that V410L and V1016I  
599 occurred independently on a C1534 haplotype followed by cis conversion by recombination. Finally,  
600 a third model assumes that the three mutations appeared independently at low frequencies and  
601 that two recombination events rearranged them in a cis configuration [56]. Considering these  
602 previous models and the results obtained in the present investigation, it is possible to hypothesize  
603 that the appearance of V410L and V1016I did not occur independently because their allelic  
604 frequencies were so similar and they almost always appeared together.

605 Regarding the 1016/1534/410 phenotype–genotype association, a relationship between the  
606  $V_{I_{1016}}/CC_{1534}/V_{L_{410}}$  genotype and resistance to  $\lambda$ -cyhalothrin and permethrin was detected in the  
607 present study. These results are consistent with the study conducted by Haddi *et al.* [38] in a  
608 pyrethroid-resistant *A. aegypti* strain from Brazil, where V410L alone or in combination with F1534C  
609 was shown to reduce sodium channel sensitivity to type I (permethrin) and type II pyrethroids ( $\lambda$ -  
610 cyhalothrin and deltamethrin). In addition, these results further support the notion that the  
611 presence of  $V_{I_{1016}}$  and  $V_{L_{410}}$  heterozygotes is sufficient to confer resistance to deltamethrin [56].  
612 These findings suggest that the interactions of multiple mutations play a role in the response of *A.*  
613 *aegypti* sodium channels to insecticides [57].

## 614 Conclusions

615 Variability was observed in pyrethroid susceptibility using the WHO and CDC bioassay  
616 methodologies, highlighting the importance of using a consistent methodology to routinely screen  
617 populations for susceptibility. The altered activity levels of  $\beta$ -esterases,  $\alpha$ -esterases, MFOs, and GSTs  
618 suggest that metabolic resistance may be important in these populations. The *kdr* mutations V1016I,

619 F1534C, and V410L were detected in all populations, with 1534C being nearly fixed in all except two  
620 populations. Finally, associations were observed between the F1534C mutation and resistance to  
621 permethrin in all populations, the F1534C mutation with resistance to deltamethrin in Chiriguana,  
622 Montería, and Valledupar, and the V1016I, F1534C, and V410L mutations and resistance to  $\lambda$ -  
623 cyhalothrin in Juan de Acosta, Valledupar, and Montería.

624

## 625 Acknowledgments

626 The authors thank Patrica Fuya from the Laboratory of Entomology, Colombian National Institute of  
627 Health; Jhon Jairo González from the Caribbean Region Node, of the project “Strengthening the  
628 entomological surveillance of *Aedes aegypti* in Colombia for the reinforcement of the national  
629 entomology network”; Lucrecia Vizcaino of the Entomology Branch of the U.S. Centers for Disease  
630 Control and Prevention; the Public Health Laboratory group, Entomology Laboratory of the District  
631 of Barranquilla and the Department of Atlántico; and Sergio Goenaga of the Public Health  
632 Laboratory of Atlántico.

633

## 634 Author Contributions

635 LSV and PXPL conceived and designed the study; LSV and AL obtained financial support; PXPL  
636 performed the fieldwork; PXPL and GRV performed the laboratory work; and PXPL and RMS  
637 analyzed the data and its presentation. PXPL, DGC, RYMS, and AL drafted the manuscript. All the  
638 authors have provided critical information on the findings and have read and approved the final  
639 manuscript.



## 640 **Disclaimer**

641 The findings and conclusions in this paper are those of the authors and do not necessarily represent  
642 the official position of the Centers for Disease Control and Prevention.

643

## 644 **References**

- 645 **1.** Padilla J, Lizarazo F, Murillo O, Mendigaña F, Pachón E, Vera M. Epidemiology of the main  
646 vector-borne diseases in Colombia, 1990–2016. *Biomédica*. 2017;37: 27-40.
- 647 **2.** World Health Organization. Dengue and hemorrhagic dengue, 2018. [cited ] Available from:  
648 <http://www.who.int/mediacentre/factsheets/fs117/es/>.
- 649 **3.** National Institute of Health. Report of the dengue event, Colombia, up to the epidemiological  
650 period 13, 2017. Pages 1-29. [cited] Available from:  
651 <http://www.ins.gov.co/Direcciones/Vigilancia/Paginas/Lineamientos-y-documentos.aspx>.
- 652 **4.** National Institute of Health. Sivigila portal. [cited] Available from:  
653 [http://portalsivigila.ins.gov.co/sivigila/documentos/Docs\\_1.php](http://portalsivigila.ins.gov.co/sivigila/documentos/Docs_1.php)
- 654 **5.** Tovar Sánchez ZM, Bolívar Pertuz SA, Maestre-Serrano R. Chikungunya: general aspects of an  
655 emerging disease in Colombia. *Biociencias*. 2015;10(1): 75 -88.
- 656 **6.** National Institute of Health. Report on the Zika event, Colombia, up to the epidemiological  
657 period 13, 2017. Pages 1-25. [cited] Available from:  
658 <http://www.ins.gov.co/Direcciones/Vigilancia/Paginas/Lineamientos-y-documentos.aspx>.
- 659 **7.** Maestre-Serrano R. Susceptibility Status of *Aedes aegypti* to Insecticides in Colombia.  
660 *Insecticides-Pest Engineering* F. Perveen Ed. 2012. ISBN: 978-953-307-895-3, InTech. [cited]

- 661 Available from: [http://www.intechopen.com/books/insecticides-pest-](http://www.intechopen.com/books/insecticides-pest-engineering/susceptibility-status-of-aedes-aegypti-to-insecticides-in-colombia)  
662 [engineering/susceptibility-status-of-aedes-aegypti-to-insecticides-in-colombia](http://www.intechopen.com/books/insecticides-pest-engineering/susceptibility-status-of-aedes-aegypti-to-insecticides-in-colombia).
- 663 **8.** Maestre-Serrano R, Pacheco-Lugo L, Salcedo-Mendoza S. Indices of aedic infestation and  
664 identification of knowledge, attitudes and practices on dengue in tire changing businesses of  
665 the Department of Atlántico, Colombia. *Rev Salud Pública*. 2015;17(5): 738-748.
- 666 **9.** Santacoloma Varon L, Chaves Cordoba B, Brochero H. Susceptibility of *Aedes aegypti* to DDT,  
667 deltamethrin, and lambdacyhalothrin in Colombia. *Rev Panam Salud Publica*. 2010;27(1): 66-  
668 73.
- 669 **10.** Fonseca I, Quiñones M, Lenhart A, Brogdon W. Insecticide resistance status of *Aedes aegypti*  
670 (L.) from Colombia. *Pest Manag Sci*. 2011;67(4): 430-437.
- 671 **11.** Ocampo C, Salazar M, Mina N, Mcallister J, Brogdon W. Insecticide resistance status of *Aedes*  
672 *aegypti* in 10 localities in Colombia. *Acta Trop*. 2011;118(1): 37-44.
- 673 **12.** Ardila S, Santacoloma L, Brochero L. Susceptibility status to insecticides of public health use in  
674 natural populations of *Aedes aegypti* (Diptera: Culicidae) from the department of Casanare,  
675 Colombia. *Biomédica*. 2013;33(3): 446-458.
- 676 **13.** Master-Serrano R, Gómez-Camargo D, Ponce-Garcia G, Flores A. Susceptibility to insecticides  
677 and resistance mechanisms in *Aedes aegypti* from the Colombian Caribbean Region. *Pestic*  
678 *Biochem Physiol*. 2014;116: 63-73.
- 679 **14.** Conde M, Orjuela L, Castellanos C, Herrera-Varela M, Licastro S, Quiñones M. Evaluation of  
680 insecticide sensitivity in populations of *Aedes aegypti* (Diptera: Culicidae) of the department of  
681 Caldas, Colombia, in 2007 and 2011. *Biomédica*. 2015;35(1): 43-52.
- 682 **15.** Granada Y, Mejía-Jaramillo AM, Strode C, Triana-Chavez O. A point mutation V419L in the  
683 sodium channel gene from natural populations of *Aedes aegypti* is involved in resistance to  $\lambda$ -  
684 cyhalothrin in Colombia. *Insects*. 2018;9(1): 23.

- 685 **16.** Bisset J. Correct use of insecticides: resistance control. *Rev Cubana Med Trop.* 2002;54(3): 202-  
686 219.
- 687 **17.** Du Y, Nomura Y, Zhorov BS, Dong K. Sodium channel mutations and pyrethroid resistance in  
688 *Aedes aegypti*. *Insects.* 2016;7(4): pii: E60.
- 689 **18.** Report–VRI-INS (2004–2014) Resistance Surveillance Network for public health use in  
690 Colombia. National Institute of Health. [cited] Available from:  
691 [https://www.ins.gov.co/buscador-eventos/Paginas/Informes-y-boletines-de-vigilancia-por-](https://www.ins.gov.co/buscador-eventos/Paginas/Informes-y-boletines-de-vigilancia-por-laboratorio_micro.aspx#InplviewHash6c8e35e2-66db-4a75-8f06fb3c6e13971f=WebPartID%3D%7B6C8E35E2--66DB--4A75--8F06--FB3C6E13971F%7D-FilterField1%3DLaboratorio-FilterValue1%3DEntomolog%25C3%25ADa)  
692 [laboratorio\\_micro.aspx#InplviewHash6c8e35e2-66db-4a75-8f06-](https://www.ins.gov.co/buscador-eventos/Paginas/Informes-y-boletines-de-vigilancia-por-laboratorio_micro.aspx#InplviewHash6c8e35e2-66db-4a75-8f06fb3c6e13971f=WebPartID%3D%7B6C8E35E2--66DB--4A75--8F06--FB3C6E13971F%7D-FilterField1%3DLaboratorio-FilterValue1%3DEntomolog%25C3%25ADa)  
693 [fb3c6e13971f=WebPartID%3D%7B6C8E35E2--66DB--4A75--8F06--FB3C6E13971F%7D-](https://www.ins.gov.co/buscador-eventos/Paginas/Informes-y-boletines-de-vigilancia-por-laboratorio_micro.aspx#InplviewHash6c8e35e2-66db-4a75-8f06fb3c6e13971f=WebPartID%3D%7B6C8E35E2--66DB--4A75--8F06--FB3C6E13971F%7D-FilterField1%3DLaboratorio-FilterValue1%3DEntomolog%25C3%25ADa)  
694 [FilterField1%3DLaboratorio-FilterValue1%3DEntomolog%25C3%25ADa](https://www.ins.gov.co/buscador-eventos/Paginas/Informes-y-boletines-de-vigilancia-por-laboratorio_micro.aspx#InplviewHash6c8e35e2-66db-4a75-8f06fb3c6e13971f=WebPartID%3D%7B6C8E35E2--66DB--4A75--8F06--FB3C6E13971F%7D-FilterField1%3DLaboratorio-FilterValue1%3DEntomolog%25C3%25ADa)
- 695 **19.** Suárez MF, González R, Morales C. Temefos resistance to *Aedes aegypti* in Cali, Colombia. 45<sup>th</sup>  
696 Annual meeting of the American Society of Tropical Medicine and Hygiene, Baltimore,  
697 Maryland. Supplement to *Am J Trop Med Hyg.* 1996;55(2): 257.
- 698 **20.** Anaya Y, Cochero S, Rey G, Santacoloma I. Assessment of susceptibility to insecticides of *Aedes*  
699 *aegypti* caught in Sincelejo. *Memoirs, XIII Colombian Congress of Parasitology and Tropical*  
700 *Medicine. Biomédica.* 2007;27(2): 257.
- 701 **21.** Salazar M, Carvajal A, Cuellar ME, Olaya A, Quiñones J, Velasquez OL, Viveros A, Ocampo C.  
702 Resistance to insecticides in populations of *Aedes aegypti* and *Anopheles spp.* in the  
703 departments of Huila, Valle Cauca and Nariño. *Memoirs, XIII Colombian Congress of*  
704 *Parasitology and Tropical Medicine. Biomédica.* 2007;27(2): 177.
- 705 **22.** Maestre R, Rey G, De las Salas J, Vergara C, Santacoloma L, Goenaga S, Carrasquillas MC.  
706 Susceptibility of *Aedes aegypti* (Diptera: Culicidae) to temephos in the department of Atlántico  
707 (Colombia). *Rev Colomb Entomol.* 2009;35(2): 202-205.

- 708 **23.** Fonseca I, Bolaños D. Temporal variation in the susceptibility to malathion and lambda-  
709 cyhalothrin in *Aedes aegypti* (L) in Quibdó, Colombia. *Biomédica*. 2009;29(1): 218-219.
- 710 **24.** Maestre R, Flores Z, Cabrera C. Susceptibility status of *Aedes aegypti* to insecticides in La Guajira  
711 (Colombia). *Am J Trop Med Hyg*. 2010;83(5): 53.
- 712 **25.** Maestre R, Rey G, De las Salas J, Vergara C, Santacoloma L, Goenaga S, Carrasquillas MC. Status  
713 of susceptibility to insecticides in *Aedes aegypti* (Diptera: Culicidae) in the department of  
714 Atlántico–Colombia. *Rev Colomb Entomol*. 2010;36(2): 242-248.
- 715 **26.** Santacoloma L, Chavez B, Brochero HL. Status of the susceptibility of natural populations of the  
716 dengue vector to insecticides in thirteen localities of Colombia. *Biomédica*. 2012;32: 333-343.
- 717 **27.** Grisales N, Poupardin R, Gómez S, Fonseca I, Ranson H, Lenhart A. Temephos resistance in  
718 *Aedes aegypti* in Colombia compromises dengue vector control. *PLOS Negl Trop Dis*. 2013;7(9):  
719 1-10.
- 720 **28.** Rojas W, González J, Amud M, Quiñones M, Vélez I. Evaluation of the susceptibility of *Aedes*  
721 *aegypti* of the municipality of Barrancabermeja, Santander, to the insecticides malathion,  
722 fenitrothion, temephos, lambda-cyhalothrin, deltamethrin, permethrin, propoxur and DDT.  
723 *Biomédica*. 2003;23(1):56
- 724 **29.** Aguirre-Obando OA, Dalla B AC, Duque L JE, Navarro-Silva MA. Insecticide resistance and  
725 genetic variability in natural populations of *Aedes (Stegomyia) aegypti* (Diptera: Culicidae) from  
726 Colombia. *Zoología*. 2015;32(1): 14-22.
- 727 **30.** Aguirre-Obando OA, Martins AJ, Navarro-Silva MA. First report of the Phe1534Cys *kdr* mutation  
728 in natural populations of *Aedes albopictus* from Brazil. *Parasit Vectors* 2017;10(1): 160.
- 729 **31.** Atencia MC, de Jesús Pérez M, Jaramillo MC, Caldera SM, Cochero S, Bejarano EE. First report of  
730 the F1534C mutation associated with cross-resistance to DDT and pyrethroids in *Aedes aegypti*  
731 in Colombia. *Biomédica*. 2016;36(3): 432-437.

- 732 **32.** Brogdon W, McAllister J. Insecticide resistance and Vector Control. *Emerg Infect Dis.* 1998;4:  
733 605-613.
- 734 **33.** WHO. Test procedures for insecticide resistance monitoring in malaria vector mosquitoes—2nd  
735 ed. Geneva: World Health Organization; 2017. License: CC BY-NC-SA 3.0 IGO. [cited] Available  
736 from: <http://apps.who.int/iris>.
- 737 **34.** Valle D, Montella IR, Ribeiro RA, Medeiros PFV, Martins AJ, Lima JB P. Quantification  
738 methodology for enzyme activity related to insecticide resistance in *Aedes aegypti*. *Fundacao*  
739 *Oswaldo Cruz and Secretaria de Vigilancia em Saude, Ministerio da Saude.* Rio de Janeiro and  
740 Distrito Federal. 2006
- 741 **35.** Brogdon W. Mosquito protein microassay. I. Protein determinations from small portions of  
742 single mosquito homogenates. *Comp Biochem Physiol B.* 1984;79B: 457-459.
- 743 **36.** Saavedra-Rodríguez K, Urdaneta-Márquez L, Rajatileka S, Moulton M, Flores AE, Fernandez-  
744 Salas I, et al. A mutation in the voltage-gated sodium channel gene associated with pyrethroid  
745 resistance in Latin American *Aedes aegypti*. *Insect Mol Biol.* 2007;16: 785-798.
- 746 **37.** Yanola J, Somboon P, Walton C, Nachaiwieng W, Somwang P, Prapanthadara L. High-  
747 throughput assays for detection of the F1534C mutation in the voltage-gated sodium channel  
748 gene in permethrin-resistant *Aedes aegypti* and the distribution of this mutation throughout  
749 Thailand *Trop Med Int Health.* 2011;16: 501-509.
- 750 **38.** Haddi K, Tomé H, Du Y, Valbon W, Nomura Y, Martins G, et al. Detection of a new pyrethroid  
751 resistance mutation (V410L) in the sodium channel of *Aedes aegypti*: a potential challenge for  
752 mosquito control. *Sci Rep.* 2017;7: 46549.
- 753 **39.** Montella IR, Martins AJ, Viana-Medeiros PF, Pereira-Lima JB, Aparecida-Braga I, Valle D.  
754 Insecticide resistance mechanisms of Brazilian *Aedes aegypti* populations from 2001 to 2004.  
755 *Am J Trop Med Hyg.* 2007;77: 467-477.

- 756 **40.** World Health Organization. Monitoring and managing insecticide resistance in *Aedes* mosquito  
757 populations: Interim Guidance for Entomologists. WHO, Geneva, Switzerland. 2016.
- 758 **41.** Flórez A. Detection of insecticide resistance in mosquitoes with emphasis on *Aedes aegypti*.  
759 *Artrópodos y Salud* Septiembre-diciembre. 2014;1(2): 21-36.
- 760 **42.** Aïzoun N, Ossè R, Azondekon R, Alia R, Oussou O, Gnanguenon V, et al. Comparison of the  
761 standard WHO susceptibility tests and the CDC bottle bioassay for the determination of  
762 insecticide susceptibility in malaria vectors and their correlation with biochemical and molecular  
763 biology assays in Benin, West Africa. *Parasite Vector*. 2013;6: 147.
- 764 **43.** Owusu H, Jančáryová D, Malone D, y Müller P. Comparability between insecticide resistance  
765 bioassays for mosquito vectors: time to review current methodology? *Parasite Vector*. 2015;8:  
766 357.
- 767 **44.** Maestre-Serrano R, Ponce-García G, Flores-Suarez. Susceptibility in *Aedes aegypti* (Diptera:  
768 Culicidae) of the municipality of Soledad (Atlántico, Colombia) to etofenprox and alpha-  
769 cypermethrin. *Rev Colomb Entomol*. 2017;43(1): 41-44.
- 770 **45.** Zlotkin E, Devonshire AL, Warmke JW. The pharmacological flexibility of the insect voltage  
771 gated sodium channel: toxicity of AaIT to knockdown resistant (kdr) flies. *Insect Biochem Mol*  
772 *Biol*. 1999;29(10): 849-853.
- 773 **46.** Rodriguez MM, Bisset JA, Ruiz M, Soca A. Cross-Resistance to Pyrethroid and  
774 Organophosphorus Insecticides induced by selection with Temephos in *Aedes aegypti* (Diptera:  
775 Culicidae) from Cuba. *J Med Entomol*. 2002;39(6): 882-888.
- 776 **47.** Tikar SN, Kumar A, Prasad GB, Prakash S. Temephos-induced resistance in *Aedes aegypti* and its  
777 cross-resistance studies to certain insecticides from India. *Parasitol Res*. 2009;105(1): 57-63.
- 778 **48.** Harris A, Rajatileka S, Ranson H. Pyrethroid resistance in *Aedes aegypti* from Grand Cayman,  
779 *Am J Trop Med Hyg*. 2010;83: 277-284.

- 780 **49.** Polson K, Brogdon WG, Rawlins S, Chadee D. Characterization of insecticide resistance in  
781 Trinidadian strains of *Aedes aegypti* mosquitoes. *Acta Trop.* 2011;117: 31-38.
- 782 **50.** Flowers AE, Albeldano-Vazquez W, Fernandez-Salas I, Badii MH, Loaiza-Becerra H, Ponce García  
783 G, et al. Elevated-esterase levels associated with permethrin tolerance in *Aedes aegypti* (L.)  
784 from Baja California, Mexico. *Pestic Biochem Physiol.* 2005;8: 66-78.
- 785 **51.** Rodriguez M, Bisset J, Fernandez D, Perez O. Insecticide resistance in larvae and adults of *Aedes*  
786 *aegypti*: prevalence of A4 esterase associated with temephos resistance. *Rev Cub Med Trop.*  
787 2004;56: 54-60.
- 788 **52.** Flores AE, Salomon-Grajales J, Fernandez-Salas I, Ponce-Garcia G, Loaiza-Becerra MH, Lozano  
789 S, et al. Mechanisms of insecticide resistance in field populations of *Aedes aegypti* (L.) from  
790 Quintana Roo, Southern Mexico. *J Am Mosq Cont Assoc.* 2006;22: 672-677.
- 791 **53.** Rodriguez M, Bisset J, Ricardo Y, Perez O, Montada D, Figueredo D, et al. Resistance to  
792 organophosphorus insecticides in *Aedes aegypti* (Diptera: Culicidae) of Santiago de Cuba,  
793 1997–2009. *Rev Cub Med Trop.* 2010;62: 217-223.
- 794 **54.** Álvarez LC, Ponce G, Oviedo M, López B, Flores AE. Resistance to malathion and deltamethrin in  
795 *Aedes aegypti* (Diptera: Culicidae) from Western Venezuela. *J Med Entomol.* 2013;50: 1031-  
796 1039.
- 797 **55.** Maestre-Serrano R, Pareja-Loaiza P, Gómez-Camargo D, Ponce-Garcia G, Flores A. Co-  
798 occurrence of V1016I and F1534C mutations in the voltage-gated sodium channel and  
799 resistance to pyrethroids in *Aedes aegypti* (L.) from the Colombian Caribbean region. *Pest*  
800 *Manag Sci.* 2018;75(6): 1681-1688.
- 801 **56.** Saavedra-Rodríguez, Vera-Maloof F, Campbell C, Garcia-Rejon J, Lenhart A, Penilla P, et al.  
802 Parallel evolution of vgsc mutations at domains IS6, IIS& and IIS& in pyrethroid resistant *Aedes*  
803 *aegypti* Mexico. *Sci Rep.* 2018;8: 6747.

- 804 **57.** Liu N. Insecticide resistance in mosquitoes: impact, mechanism and research direction. Annu  
805 Rev Entomol. 2015;60: 537-559.



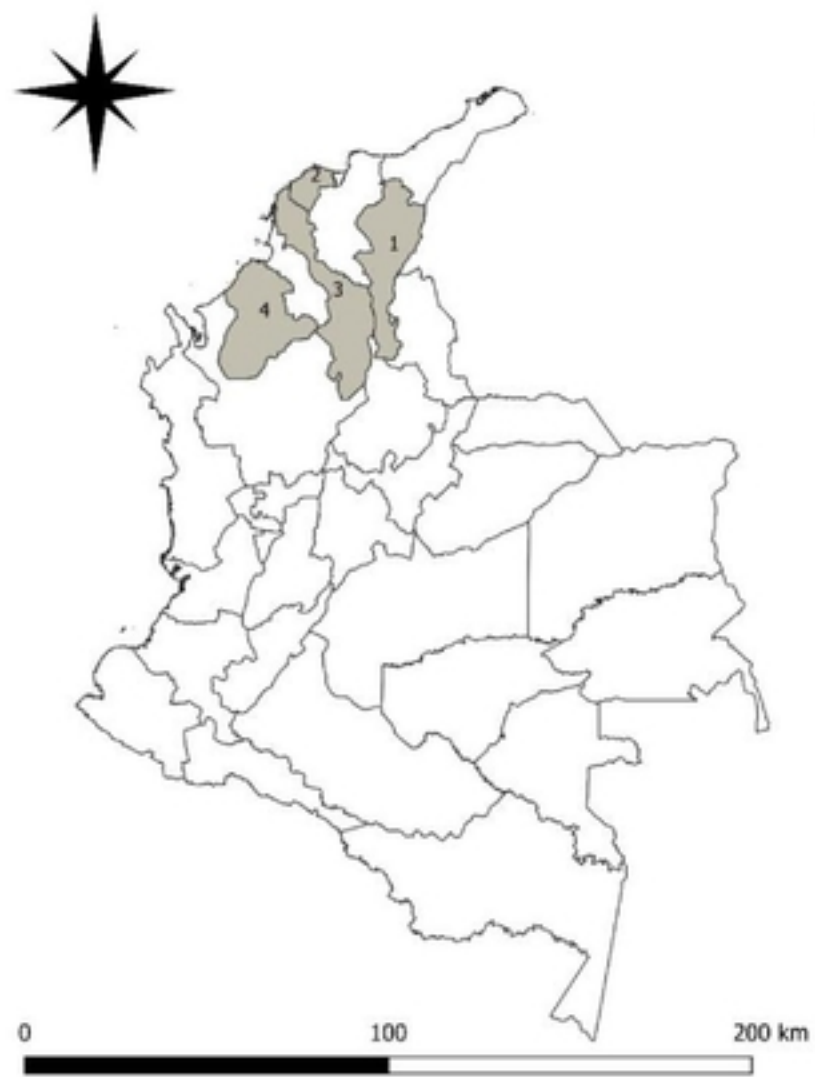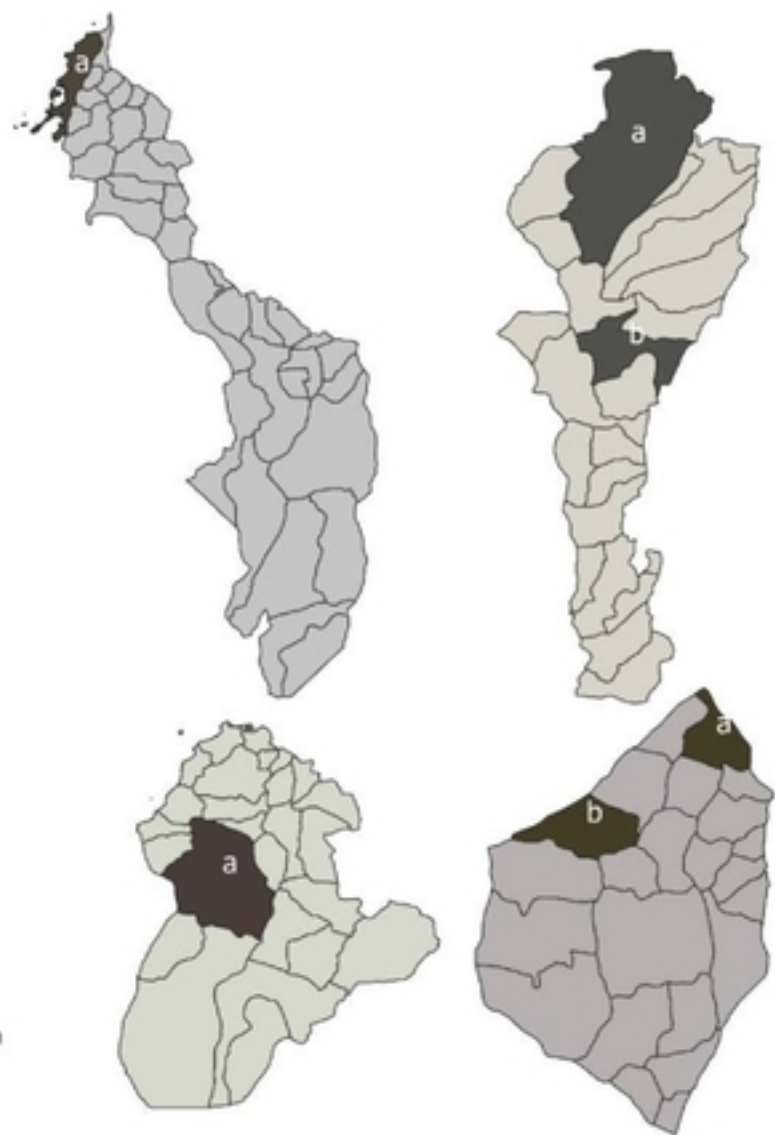

Fig 1 MAPA

### 24 hours post-exposure

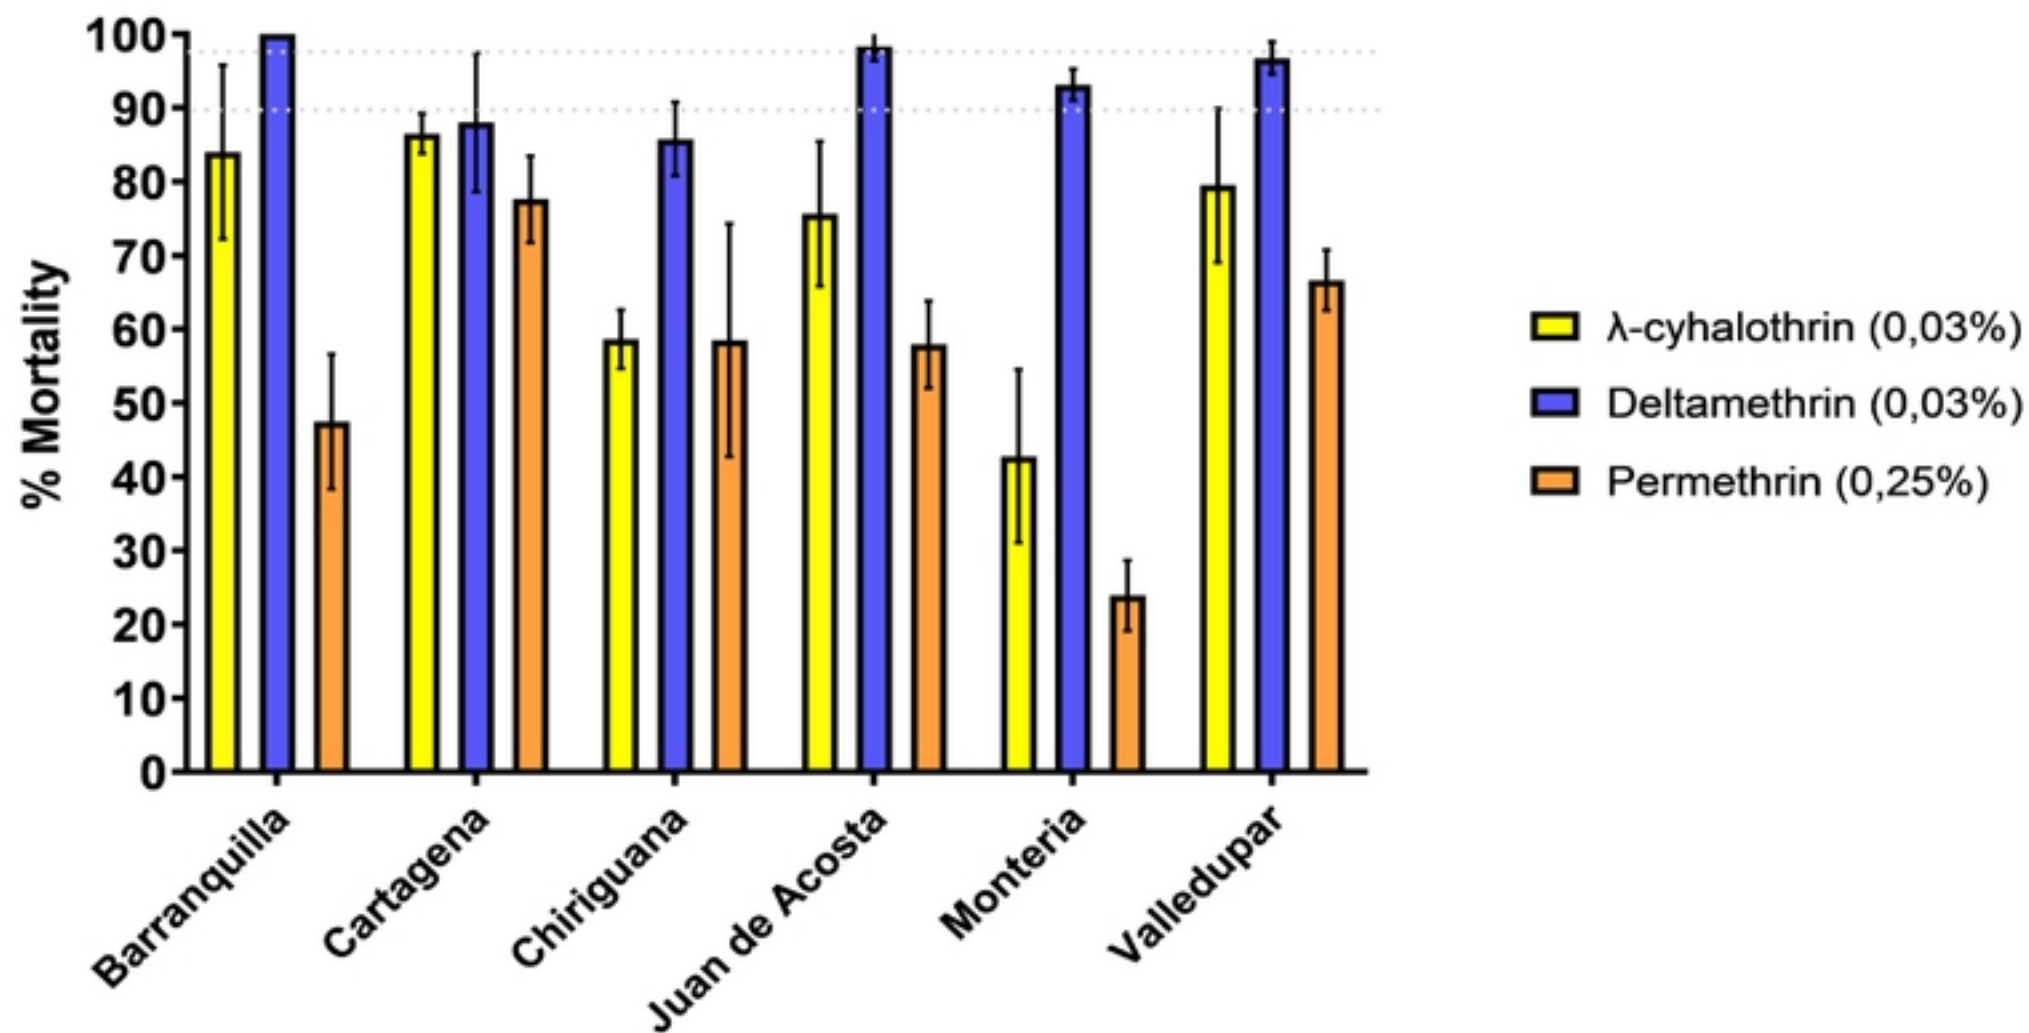

Fig 2 OMS

a)  $\lambda$ -cyhalothrin (10 ug/Bottle)

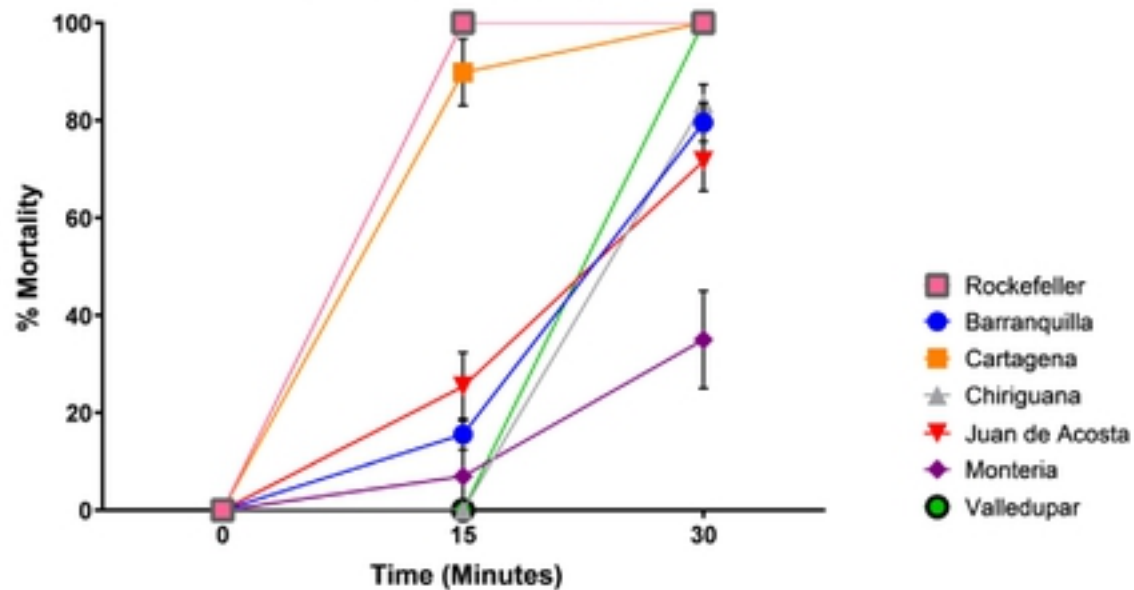

b) Deltamethrin (10 ug/Bottle)

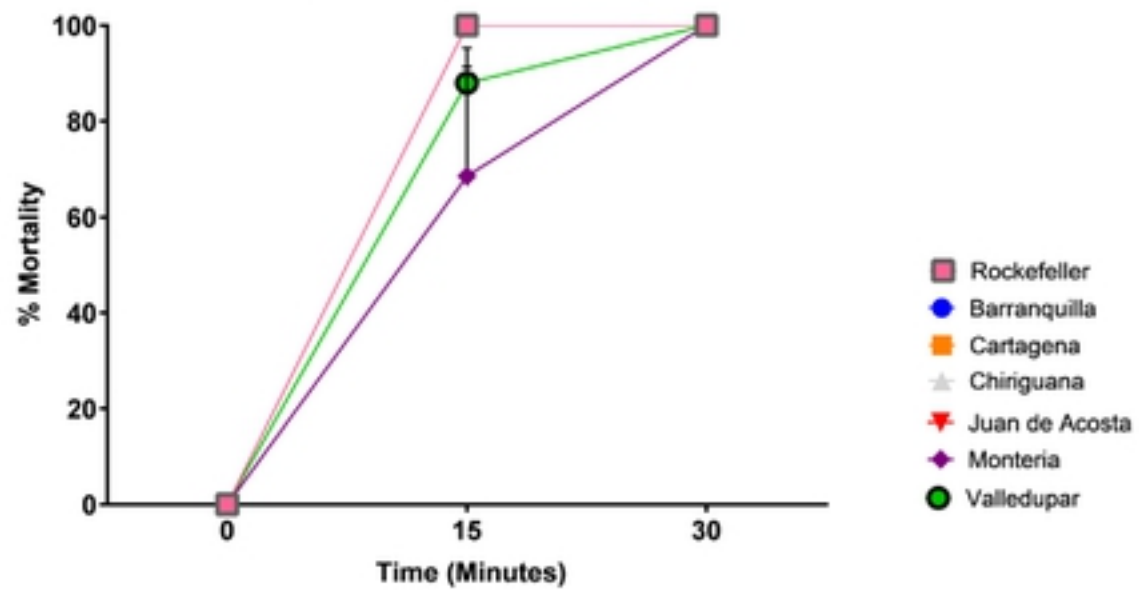

c) Permethrin (10 ug/Bottle)

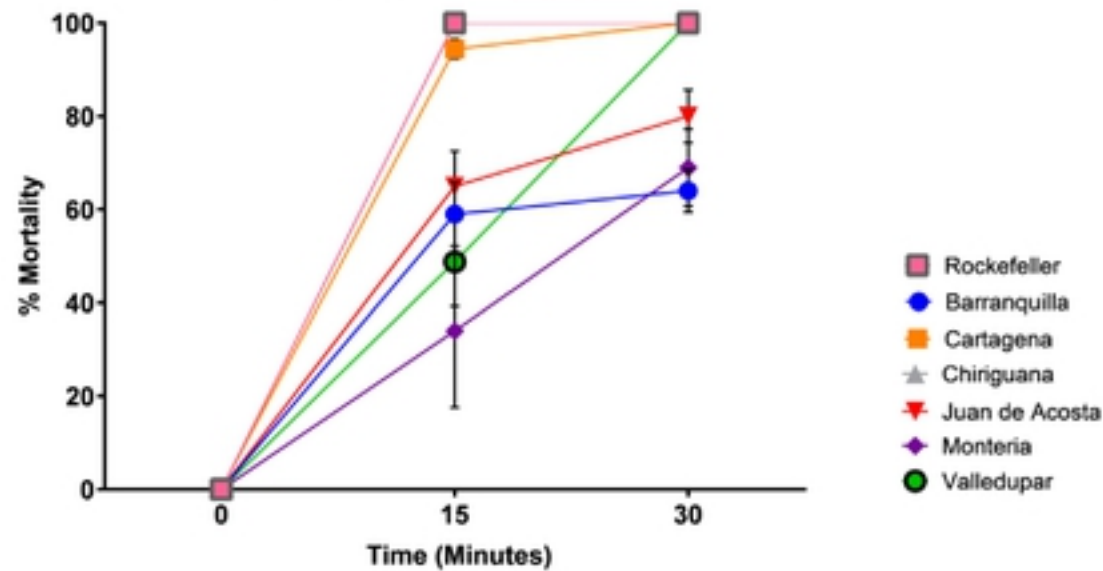

Fig 3 CDC

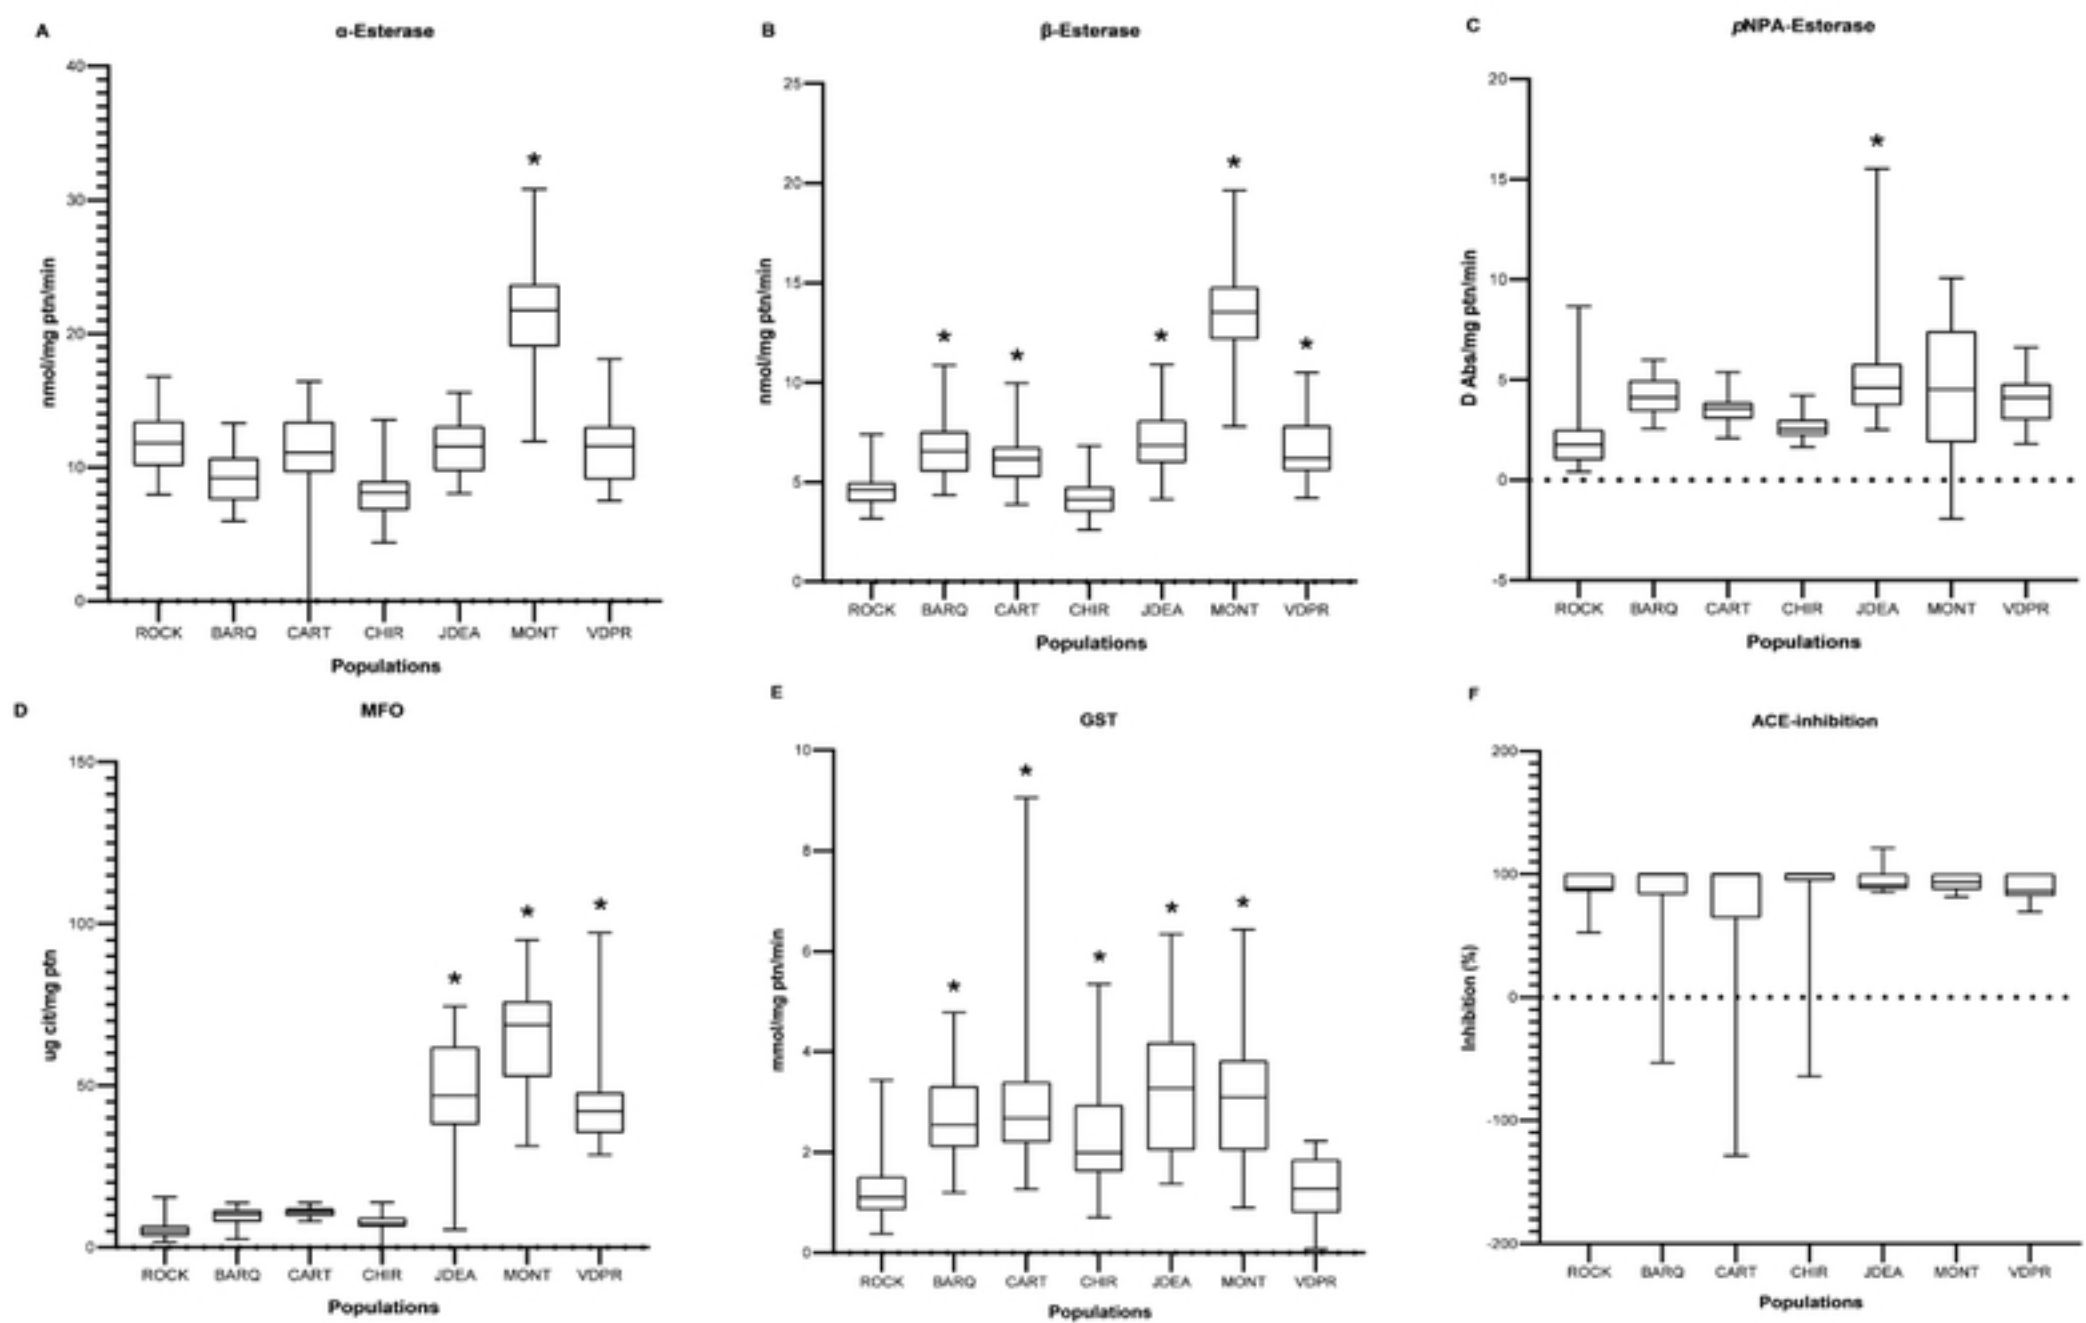

Fig 4 ENZIMAS

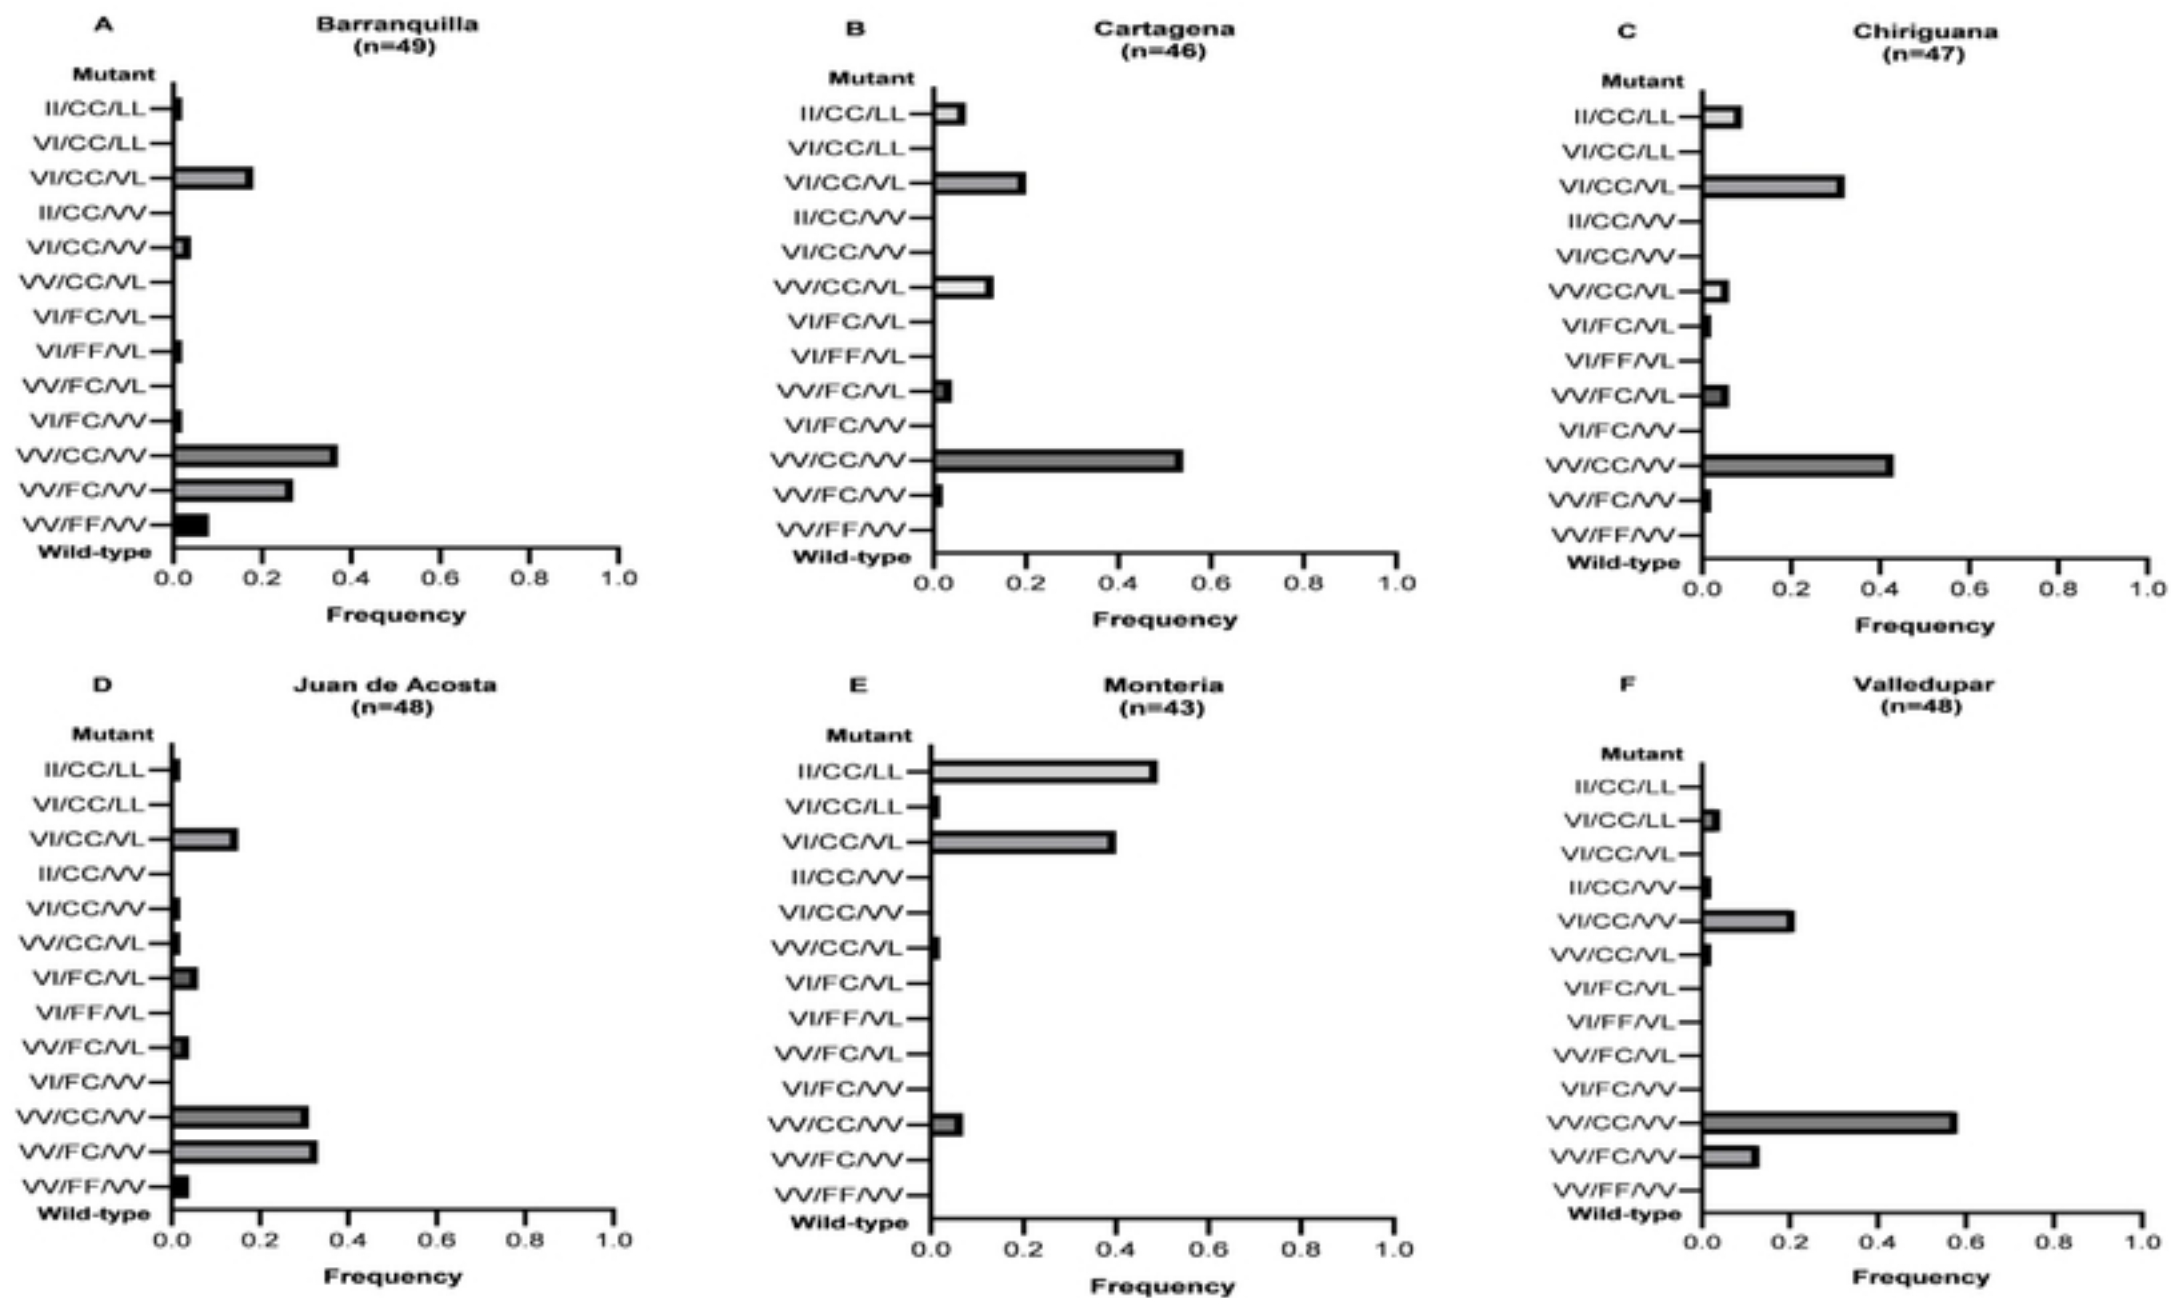

Fig 5 FRECUENCIAS
